# Supplementary material for: Validation of middle-atmospheric wind in observations and models
Source: Copernicus journal article supplement (doi:10.5194/amt-2017-390), 2017-11-21
Supplement: Supplementary file [file amt-2017-390-AC1-supplement.zip]

# Validation of middle-atmospheric wind in observations and models

Rolf Rüfenacht<sup>1,\*</sup>, Gerd Baumgarten<sup>1</sup>, Jens Hildebrand<sup>1</sup>, Franziska Schranz<sup>2</sup>, Vivien Matthias<sup>1</sup>,  
Gunter Stober<sup>1</sup>, Franz-Josef Lübken<sup>1</sup>, and Niklaus Kämpfer<sup>2</sup>

<sup>1</sup>Leibniz-Institute of Atmospheric Physics at the Rostock University, Kühlungsborn, Germany

<sup>2</sup>Institute of Applied Physics, University of Bern, Bern, Switzerland

\*now at: Institute of Applied Physics, University of Bern, Bern, Switzerland

Correspondence to: rolf.ruefenacht@iap.unibe.ch

**Abstract.** Wind profile information throughout the upper stratosphere and lower mesosphere (USLM) is important for the understanding of atmospheric dynamics but became available only recently, thanks to developments in remote sensing techniques and modelling approaches. However, as wind measurements from these altitudes are still very rare, such products have generally not yet been validated with (other) observations. This paper presents the first long-term intercomparison of wind observations in the USLM by opposing co-located microwave radiometer and lidar instruments at Andenes (69.3° N, 16.0° E). Good correspondence has been found at all altitudes for both horizontal wind components for nighttime as well as daylight conditions. Biases are mostly within the random errors and do not exceed 5-10 m/s which is less than 10% of the typically encountered wind speeds. Moreover, comparisons of the observations with the major re-analyses and models covering this altitude range are shown, especially also with the freshly released ERA5, ECMWF's first re-analysis to cover the whole USLM region. The agreement between models and observations is very good in general, but temporally limited occurrences of pronounced discrepancies (up to 40 m/s) exist. In the article's appendix the possibility of obtaining nighttime wind information about the mesopause region by means of microwave radiometry is investigated.

## 1 Introduction

Observations of the wind field in the upper stratosphere and lower mesosphere (USLM) are challenging. The consequence is a substantial data gap between 10 and 0.02 hPa ( $\sim 32$  to 70 km). Figure 1 summarises the altitude coverage of the currently existing data. On the one hand, balloon-borne measurements do not assess the USLM due to the lack of backscatterers (Hildebrand et al., 2010; Baumgarten et al., 2010; Baumgarten et al., 2012). On the other hand the transport of in situ sensors is very difficult. For many years rocket-aided measurements were thus carried out since the 1960s (National Research Council, 1966). They offer high vertical resolution but are very manpower- and cost-intensive. Hence, measurements are only made on campaign basis so that the data set consists of snapshots of the atmosphere highly scattered in time.

In the last decade two new techniques for wind observations in the USLM became operational: Doppler microwave wind radiometry and middle-atmospheric lidar spectroscopy (Rüfenacht et al., 2012; Baumgarten, 2010). Due to the novelty of these approaches and the absence of satellite data thorough validations with two independent measurement techniques synchronously

discussion on radars extended, see also reply to your major comments, no comma here, added comma  
Chanin and colleagues? 1 MST in daytime?  
More information on older lidar work is now provided, Chanin and others cited

footnote added: "STable Retardation parachute TE, an extra-stable falling target deployed by the rocket and tracked by ground-based radars (e.g. Schmidlin et al., 1985)."

assessing the same atmospheric volume are at a very early stage. Lübken et al. (2016) presented comparisons between observations with the ALOMAR RMR lidar and eight nighttime starute soundings by rockets. In most cases good correspondence between both techniques has been found, even in the small-scale structures. However, for some soundings the intercomparisons suffered from differing spatial sampling. Such sampling issues are closely related to the snapshot nature of rocket measurements. They can largely be overcome when comparing techniques which both allow longer observation times, as it is the case for the radiometry and lidar approaches, because atmospheric inhomogeneities tend to average out over time. The RMR wind lidar and the ground-based wind radiometer WIRA have been operated next to each other at ALOMAR observatory in Andenes (69.3° N, 16.0° E) for a 11 months intercomparison period between 1 August 2016 and 30 June 2017 containing more than 500 hours of coincident observations. *measurements ok*

In parallel to the development of new measurement techniques most important general circulation models for numerical weather prediction and re-analysis have extended their lids ~~far~~ into the middle atmosphere during the last years ~~owing the~~ *due to* broad evidence for the influence of middle-atmospheric dynamics on tropospheric weather and climate (e.g. Baldwin and Dunkerton, 2001; Scaife et al., 2008; Kidston et al., 2015; Garfinkel et al., 2017). The most recent example of this trend towards increased model tops is ECMWF's ERA5 re-analysis released in July 2017 *ok* which extends up to 0.1 hPa, one pressure decade higher than its predecessor ERA-Interim. In addition to the improvement of the tropospheric forecast skills of the weather predictions, the higher model lids made available re-analysis data for the stratosphere and mesosphere which are widely used in the research community. However, up to now, only few comparisons between wind observations and models exist: Kishore Kumar et al. (2015) analysed the correspondence of fortnightly rocket wind soundings with the MERRA re-analysis and Hildebrand et al. (2012, 2017) showed comparisons between January nighttime lidar measurements and ECMWF operational analysis and forecast data. The present study will show for the first long-term intercomparisons between wind observations and state-of-the-art models and re-analyses (ERA5, ECMWF forecasts, MERRA2, SD-WACCM) by using the 11 months quasi-continuous data set recorded by the microwave radiometer WIRA. *ok*

In this paper the first part describes the measurement techniques for wind observations in the USLM (Sect. 2), the models and re-analyses used in this study (Sect. 3) and considerations to the effects of spatial and temporal sampling (Sect. 4). In Sect. 5 the intercomparisons between the coincident lidar and radiometer observations are presented alongside with short-term comparisons to models. Model validations on longer time scales are described in Sect. 6 before we draw the conclusions of our research in Sect. 7.

## 2 Measurement techniques

Fig. 1 illustrates the unique situation of Andenes (69.3° N, 16.0° E) where all currently available wind measurement techniques covering the gap region in the USLM are concentrated.

*would leave this out. you already called out*

*Fig 1* Yes, but in another context. Here we want to specifically illustrate the situation at Andenes, the location of the present study and give a graphical overview of the instruments described in the following subsections. We judge this helpful for the reader and did therefore not change the manuscript here.

## 2.1 Doppler microwave radiometry

Microwave radiation from rotational transitions is emitted by atmospheric constituents present in the gap region for wind observations in the USLM. Ground-based microwave radiometers have been widely used to determine the concentrations of the emitting molecules, e.g. water vapour, ozone or carbon monoxide (Tobisger, 1987; Nedoluha et al., 1995; Forkman et al.

The sentence has been clarified: "Microwave radiation is emitted in transitions between rotational quantum levels of molecules with electric (or magnetic) dipole moment, which are present in the gap region for wind observations in the USLM."

First measurements of profiles of horizontal wind by ground-based microwave radiometry had been presented by Rüfenacht et al. (2012). Recently, another similar instrument became operational (Hagen, 2015). The possibility for spaceborne wind observations with a comparable approach has also been demonstrated: SMILES was operated during 7 months onboard the International Space Station (ISS) (Baron et al., 2013) and an early-stage project for a satellite microwave limb sounding wind instrument exists (Baron et al., 2015).

The ground-based Doppler microwave wind radiometer WIRA which contributes to the present study is an upgraded version of the instrument presented in Rüfenacht et al. (2012). For the determination of wind profiles the Doppler shifts of signals from opposite azimuths in  $68^\circ$  off-zenith direction are compared. The retrieval algorithm which is based on the optimal estimation method (Rodgers, 2000) is similar to the version in Rüfenacht et al. (2014) with a constant zero wind a priori profile. In this study we use identical a priori standard deviations for both horizontal wind components equivalent to 4 times the standard deviation of 6 years of zonal wind data from ECMWF. In order to account for the high nighttime ozone concentrations which occur in the mesopause region the retrieval algorithm has been improved according to Rüfenacht and Kämpfer (2017). It now uses distinct ozone a priori profiles for nighttime or sunlit periods at the mesopause, discriminated by the sunrise/sunset at 100 km altitude. With these modification the authors judge also the nighttime observations of mesospheric wind by WIRA to be bias-free, what is intended to be confirmed in the present study.

The wind radiometer WIRA can provide zonal and meridional wind profiles with a vertical resolution of 10-16 km with minimal integration times of around 5 hours. The trustworthy altitude range, i.e. where the measurement response is  $> 0.8$ , the altitude resolution is  $< 20$  km and the altitude accuracy is  $< 4$  km (for details see Rüfenacht et al., 2014), typically extends from 7 to 0.03 hPa ( $\sim 35$  to 70 km). Microwave radiometers can be highly automatised and have the ability to pursue the measurements during overcast conditions what leads to near-continuous time series of observations, a characteristic that will be exploited for the model validations during almost a full annual cycle presented in Sect. 6.

## 2.2 Middle atmospheric wind lidar

Lidar systems with powerful lasers, large telescopes and sensitive detection optics are able to get usable molecular backscatter from altitudes up to beyond 70 km. When high frequency stability and calibration standards are met, wind can be determined

As described in Rüfenacht et al. 2014 the ozone profile retrievals are kept independent for both observation directions, i.e. homogeneity is not required. The effect of differing ozone profiles on the wind profiles has been thoroughly investigated in Rüfenacht et al. 2014 and found to be marginal.

Causal - Spatially Homogenous over  $\pm 22^\circ$

The first observations of zonal and meridional wind by lidars covering the entire gap region in the USLM have been presented by Baumgarten (2010) using the Rayleigh/Mie/Raman (RMR) lidar at ALOMAR, the instrument which is contributing to the present study. Validations of the method for nighttime observations have been presented by Hildebrand et al. (2012) and Lübken et al. (2016). Measurements of temperatures and wind during day and night are presented in Baumgarten et al. (2015). Recently, middle-atmospheric wind measurements from a similar instrument have been reported by Yan et al. (2017).

The ALOMAR RMR-lidar obtains wind information by single-edge iodine absorption spectroscopy on the 532 nm signal from 20° off-zenith. Injection-seeding of the ~~power~~ laser by a highly frequency-stable continuous wave laser, real-time monitoring of the wavelength transmitted to the atmosphere as well as regular calibrations of the frequency dependence of the transmission through the receiver optics and the iodine vapour cell assure the accuracy of the wind observations. Moreover, the exactitude of the calibration is optimised by performing 1 hour of vertical wind observations at the beginning of each measurement run (for details see Baumgarten, 2010; Hildebrand et al., 2012).

Thanks to its narrow field of view (100  $\mu$ rad) and the possibility to add a Fabry-Pérot etalon with high finesse to the optical path, the system has full daylight capability, which is especially valuable at high latitudes with polar day conditions. The daylight mode is automatically enabled when the solar elevation is higher than 4° below the horizon, (i.e. sunrise at 16 km). The frequency-dependent optical properties of the etalon and its effect on the different beam paths need to be accurately known from calibration measurements, what adds a supplementary difficulty to the daylight wind measurements. In the previous rocket-lidar intercomparisons by Lübken et al. (2016) only nighttime wind profiles have been investigated, daylight profiles will for the first time be validated in the study presented here.

The ALOMAR RMR lidar delivers wind profiles with very high vertical and temporal resolution (natively 150 m and 5 minutes). Some binning of the data is usually applied for increasing the signal-to-noise ratio. The measurement uncertainty depends on altitude and ranges from about 1 to 10 m/s at altitudes between 50 and 80 km for integration times of 1 hour and vertical resolutions of 2 km. As for any middle-atmospheric lidar, the operation of the RMR lidar is limited to clear-sky conditions.

### 2.3 Meteor radar

Data from the Andenes meteor radar will be used in the present study although it is not directly covering the gap region for wind observations in the USLM. Indeed, the lowest altitudes covered by the meteor radar are adjacent to the uppermost levels covered by WIRA and the RMR lidar so that it can help in the interpretation of the wind data at the highest levels of the USLM gap region.

Meteor radars providing wind observations through the evaluation of the drift of meteor trails in the wind field of the mesosphere/lower thermosphere region are a well-established technique (Hocking et al., 2001a; Jacobi, 2011; Fritts et al., 2012; Iimura et al., 2015). The reliability has also been demonstrated in recent comparisons to other remote sensing techniques and the Navy Global Environmental Model (NAVGEM) (Reid, 2015; McCormack et al., 2017; Wilhelm et al., 2017).

The Andenes meteor radar operates at 32.55 MHz with a peak power of 30 kW. The typical altitude range extends from 75 to 105 km. Details of the retrieval algorithm have been presented in Stober et al. (2017).

### 3 General circulation models, re-analyses and geostrophic wind

#### 3.1 ECMWF ERA5 and forecast data

The recently released ERA5 re-analysis (Hersbach and Dee, 2016) is the European Centre for Medium-Range Weather Forecast's (ECMWF) first re-analysis to extend throughout the mesosphere up to 0.1 hPa. It provides hourly output so that a good temporal match with the observation data can be achieved. At the time of writing only the data prior to 31 December 2016 had been released. Therefore, alongside the ERA5 high-resolution (HRES) data, hourly forecasts (FC) from IFS cycles 41r2 (from 1 Aug 2016 to 21 Nov 2016), i.e. the same cycle as for the ERA5 re-analysis, and 43r1 (from 22 Nov 2016 to 30 Jun 2017) are used in the present study (ECMWF, 2017). ECMWF models and re-analyses use a 4DVAR assimilation scheme. The only source of upper air assimilations are infrared nadir sounders (AIRS, HIRS, IASI) (Dragani and McNally, 2013).

#### 3.2 MERRA2

The Modern-Era Retrospective analysis for Research and Applications-2 (MERRA2) is the current re-analysis of NASA's Goddard Earth Observing System-5 (GEOS-5) model with 3-hourly output extending up to 0.01 hPa (Molod et al., 2015). It is the successor of the discontinued MERRA re-analysis used in the intercomparison study by Kishore Kumar et al. (2015). In contrast to ECMWF's models and re-analyses, MERRA2 also assimilates USLM observations from the microwave limb sounder (MLS) on the Aura satellite (Waters et al., 2006) in a 3DVAR assimilation scheme. A detailed description of the MERRA2 re-analysis was recently presented by Gelaro et al. (2017).

#### 3.3 SD-WACCM

Thanks to its model top as high as  $6 \cdot 10^{-6}$  hPa the Whole Atmosphere Community Climate Model WACCM (Marsh et al., 2013) is a well-established data source for studies of middle-atmospheric dynamics. WACCM has a specified dynamics version named SD-WACCM (Lamarque et al., 2012; Kunz et al., 2017) which is suitable for intercomparisons with measurement data. SD-WACCM is nudged with temperature, horizontal winds and surface pressure. For the present study SD-WACCM was nudged to the GEOS-5 meteorological analysis data at every 30 minutes time step with a nudging coefficient of 10% below 50 km decreasing to 0% at 60 km. In the model gravity waves are parameterised whereas planetary waves are resolved (Richter et al., 2010). SD-WACCM has a free running chemistry in the whole atmosphere.

#### 3.4 Geostrophic wind from the MLS geopotential height field

The geostrophic wind describes the balance between Coriolis force and pressure gradient force and flows parallel to the isobars. This balance holds seldom exactly in the real atmosphere due to other forces such as friction. However, the geostrophic wind is a good approximation outside the tropics and therefore can be used for comparison with the other wind data in this study. Additionally, in contrast to the models previously described in this section, this approach has a very direct connection between the wind field and observed data at the altitudes of interest.

We replaced "other forces" by "non-conservative forces" and left out the friction example as it is confusing for the middle atmosphere

we removed this sentence as it is not relevant for the dynamics and seems to confuse the readers

We have re-written this section upon your requests

We have re-written this part providing more information on the nudging

This is discussed in our reply to your major comments

more important is curvature of isobars and baroclinic instability?

modified

I don't understand

? friction is near the surface; do you mean viscosity?

Here, we calculate the geostrophic zonal ( $u_g$ ) and meridional ( $v_g$ ) wind from geopotential height (GPH) profiles of the Microwave Limb Sounder (MLS) on board the Aura Satellite (Waters et al., 2006; Livesey et al., 2015) by

$$u_g = -\frac{1}{f} \frac{\partial \Phi}{\partial y} \quad v_g = \frac{1}{f} \frac{\partial \Phi}{\partial x} \quad (1)$$

where  $\Phi$  is the geopotential,  $f$  is the Coriolis parameter, and  $x$  and  $y$  are used to denote the partial derivatives  $(a \cos \phi)^{-1} \frac{\partial}{\partial \lambda}$  and  $a^{-1} \frac{\partial}{\partial \phi}$  where  $\lambda$  is longitude,  $\phi$  is latitude and  $a$  is the radius of the earth. ok

MLS has a global coverage from 82°S to 82°N on each orbit and a usable height range from 261 to 0.001 hPa (11 to 97 km), with a vertical resolution of  $\sim 4$  km in the stratosphere and  $\sim 14$  km at the mesopause. Daily averages of version 4 MLS data were used and the most recent recommended quality screening procedures of Livesey et al. (2015) have been applied. The GPH observations have a precision between  $\pm 30$  m at the tropopause and  $\pm 110$  m at the mesopause level and a bias of 50 to 150 m in the troposphere and stratosphere and up to -450 m at 0.001 hPa (Froidevaux et al., 2006; Schwartz et al., 2008). ok

For the geostrophic wind estimation the original orbital MLS data are accumulated in grid boxes with 20° grid spacing in longitude and 5° in latitude and averaged over one day. This global smoothed data is then used to calculate the global geostrophic wind using equation 1. For the comparison with the local measurements the average geostrophic wind in the area 67° – 72°N and 0° – 30°E is chosen from the global calculations.

Due to the sun-synchrony of MLS the area of interest is equally overpassed on ascending and descending, i.e. daylight and nighttime, orbits. Thus, the influence of tides on geostrophic wind calculated from daily average MLS GPH data is marginal.

#### 4 Spatial and temporal sampling of observations and models

A crucial aspect of intercomparisons of atmospheric data is to account for the different temporal and spatial sampling of the used instruments and models. Radiometer winds are retrieved on pressure levels while the lidar operates on a geometrical height grid, therefore all data are transformed to pressure coordinates according to the CIRA86 climatology (Fleming et al., 1990) for the respective day.

##### 4.1 Horizontal and temporal sampling

The lidar observations are almost true point measurements, no horizontal averaging is involved. Due to their off-zenith nature the measured wind profiles are not completely vertical, e.g. the return signal at 70 km altitude originates from a point with a horizontal distance of 25 km to the observatory. Such small horizontal distances can safely be neglected in the present context. In contrast, the wind speeds obtained by the microwave radiometer involve measurements at two points horizontally distant by  $2z \cdot \tan(68^\circ)$ , where  $z$  is altitude above the observatory, i.e. 150, 250 and 350 km at altitudes of 30, 50, 70 km, respectively. Models and re-analyses also feature substantial horizontal smoothing so that particularly localised features are not captured. The data set with the lowest horizontal and temporal resolution are the geostrophic winds calculated from MLS geopotential heights (see Sect. 3.4).

In comparisons involving snapshot measurements such as rocket soundings or short-term lidar observations, effects from the previously described differing horizontal sampling can under no circumstances be neglected. Here, we consider only observations with integration times of more than 5 hours what mitigates the effects of different horizontal sampling. Over such long time periods, the average state of the middle atmosphere can normally be expected to be reasonably homogeneous over a few hundreds of kilometres of horizontal distance, especially in zonal direction. That this also holds for the meridional direction is illustrated by the Supplement's Fig. S6 which shows that the effect of horizontal sampling by the wind radiometer induces biases in the order of a few cm/s only even in the case of unusually strong meridional wind gradients over the observatory.

## 4.2 Vertical sampling

ok

In contrast to horizontal smoothing the vertical structures are far more persistent in time. Therefore it is important to consider the limited vertical resolution of microwave radiometers which is in the order of 10-16 km for WIRA's wind observations. To compare high-resolution data  $x_i$  (where  $i$  stands for lidar or model data) to the observations from WIRA, these should be convolved with the radiometer's averaging kernels  $A$  (for details see Rüfenacht and Kämpfer, 20

$$x_{i,c} = A(x_i - x_a) + x_a$$

→ call this smoothing error?

This is discussed in reply to your comment #8 in the main document

where the a priori wind profile  $x_a$  used by the radiometer is constantly zero. In the case of perfect instruments and models data all profiles  $x_{i,c}$  and the observations by WIRA would agree within their random errors.

ok

ok

what about systematic uncertainties?

This is discussed in our reply to your major points

## 5 Intercomparisons for lidar operation times

In the sake of conciseness we mainly present averages over several days of measurements in this section. For the interested reader the wind profiles from the radiometer, the lidar and the models for each individual day and night of observation are re-printed in the Supplement's Figs. S1 to S4.

The longest uninterrupted lidar measurement of the intercomparison campaign took place from 3 to 11 February 2017 and lasted for 187 hours. The time series of the lidar and radiometer zonal and meridional wind profiles are shown in Figs. 2 and 3, respectively. These observations cover a particularly dynamic time period in the vicinity of a minor sudden stratospheric warming. For instance the zonal wind reverts its direction from -40 to 40 m/s within a few days. Obviously the lidar time series feature structures of atmospheric waves which can not be resolved by the microwave radiometer. Beyond this difference of resolution the time series from the two instruments correspond very well.

In Fig. 2 the strong westward winds on 3 February, the pronounced decrease in the wind velocities at stratopause level in the evening of 4 Feb along with the wind direction being inverted to eastward above 0.3 and below 3 hPa are all captured by both instruments. The same is true for the following westward acceleration on 5 and 6 Feb as well as the inversion of wind direction to eastward with two distinct wind speed maxima in the night of 8/9 and 10/11 Feb. It should be noted that also the altitudes and the timing of the features correspond very well. The most notable difference is that the radiometer wind at stratopause

level on 4 Feb stays slightly negative whereas the lidar reaches a zero zonal wind situation what can mostly be attributed to the temporal averaging by WIRA which includes negative winds from before and after this event.

Similar considerations apply to the meridional wind in Fig. 3. Weak northward winds at the beginning of the time series are followed by a strong increase in wind speed between 4 and 7 Feb in both the radiometer and the lidar observations. The subsequent decrease and reversal to southward direction in the stratosphere during 8 Feb, another increase in northward wind and finally the reversal to substantial southward winds below 0.3 hPa in the night from 10 to 11 Feb are also recorded by both independent instruments.

For more quantitative analyses the average daylight and nighttime wind profiles of this measurement period are presented in Fig. 4 and 5, respectively. The wind at each level has been averaged with the weights being the integration times  $\Delta t_i$  of data sampled at this level during measurement  $i$ , i.e.  $u_{\text{avg}} = \sum(\Delta t_i \cdot u_i) / \sum \Delta t_i$ . The errors of these average winds were accordingly calculated using Gaussian error propagation:  $\sigma_{\text{avg}} = \sqrt{\sum(\Delta t_i \cdot \sigma_i)^2 / \sum \Delta t_i}$ .

Generally daylight observations are more challenging for the lidar because of potential uncertainties related to the positioning of the additional Fabry-Pérot Etalon, whereas the nighttime radiometer wind measurements were known to be biased before the upgrade of the retrieval by Rüfenacht and Kämpfer (2017). Only time periods where lidar and radiometer are both in their respective daylight or nighttime configurations have been considered in the following analyses in order to independently validate both modes of each instrument.

For the daylight periods (Fig. 4) both observations and all models are in very close agreement at all altitudes and for both wind components. They all lie well within the random errors which are more than one order of magnitude smaller than the fluctuations of the atmospheric wind during this time. Only the meridional component of the geostrophic wind calculations shows an offset. This is, however, not surprising when considering the coarse resolution of this data set in combination with a very dynamic period with pronounced wind gradients around Andenes.

During nighttime (Fig. 5) up to 0.3 hPa all data sources agree within WIRA's observation errors or are very close. Above, substantial differences among the various data sources are visible. Notably the radiometer and lidar zonal winds agree throughout the entire altitude range and the ECMWF forecasts are close to the observations. In contrast, MERRA2 is slightly offset by 7 m/s and SD-WACCM by more than 15 m/s. For the meridional component, lidar and radiometer span the spread of offsets above 0.3 hPa which can reach up to 20 m/s. The model winds are scattered in between with ECMWF closest to the lidar, SD-WACCM closest to the radiometer and MERRA2 equally differing from both observed wind profiles. The lowermost meteor radar observations tend to indicate a preference for the low wind speeds measured by the wind radiometer. The reason for the disagreement between the meridional winds measured by the radiometer and the lidar at high altitudes could not be definitely identified. It can not be attributed to the different spatial sampling (see Supplement's Fig. S6), but the substantial spread among the models and re-analyses indicate a rather heterogeneous atmosphere. Thus a differing temporal evolution of the sensitivities of the instruments to these high altitudes might explain the dissent. In any case, as the zonal wind measurements are in very close agreement it is not believed that the high-altitude differences in meridional wind observations during these times indicate a fundamental instrumental problem.

1. This difference could be from the tide not averaging out as mentioned previously

This is discussed in our reply to your major points

↳ or you are averaging across a meridional gradient

As discussed above, based on Supplementary Fig. S6, we do not think this can be explained by meridional gradients. We extended our possible explanation on page 8, line 33 by: “Such effects could be introduced by temporally evolving cirrus or polar stratospheric clouds altering the transmission of the lidar signal or by variations of the mesospheric ozone concentration modulating the strength of the microwave emissions.”

The dynamical situation around these recordings the interested reader is referred to Figs. 5 and 10 in Sect. 5 where days with lidar measurements are marked by green dots.

The daylight zonal winds of all models agree within the radiometer’s random errors (Fig. 6). The lidar and the radiometer are in close correspondence up to 0.3 hPa, above the lidar has recorded more eastward winds with offsets of up to 10 m/s also slightly disagreeing with the models. One should however note the increasing uncertainty at these altitudes so that the error bands of WIRA and the RMR lidar almost overlap over the entire sensitive altitude range. The accordance for the daylight meridional component of the different data sources is very good at all altitudes.

A similar picture with again very close correspondence among the comparison data at all altitudes manifests for the nighttime zonal winds (Fig. 7). In contrast, the additional 54 hours contributing to this plot can obviously not eliminate the previously discussed meridional wind biases from the 104 hours of the long February observation shown in Fig. 5.

Despite the generally very good long-term agreement it should be noted that on shorter time scales the measurements may disagree with the models (see also Supplement’s Figs. S1 to S4). A particularly illustrative example of this situation is presented in Fig. 8. It shows the zonal wind profiles for the night from 4 to 5 February 2017, i.e. during the maximum of the minor stratospheric warming. Clearly the lidar and radiometer observations agree within their random errors. In contrast, all model and re-analysis data correspond well to the observations in the stratosphere but lie significantly outside the error bands above 0.3 hPa apparently failing to correctly represent the extent of the mesospheric wind shear. With an offset of 17 m/s at 0.1 hPa MERRA2 is by far the closest to the observations while the offsets for ECMWF forecasts and SD-WACCM exceed 35 m/s. This could be an indication that the assimilation of mesospheric data from MLS drives the model closer to reality. The geostrophic wind computed from MLS disagreeing with the observations over the entire altitude range are due to the very localised effects in space and time during this minor warming being averaged out when considering the 5°/30°/24 hour latitude/longitude/time window for these calculations.

## 6 Intercomparisons between near-continuous observations and models

Lidar observations are limited to clear sky conditions. Moreover particularly short lidar observations have not been considered in the observational intercomparisons for two main reasons: some minimal integration time is needed for guaranteeing a sufficiently homogeneous wind field of the horizontal area sampled by the instruments and for the wind radiometer to deliver stable wind retrievals. Therefore the results in Sect. 5 only cover a comparatively small subset of the observations collected by WIRA. In the present section we aim to exploit the entire data set obtained by the wind radiometer at ALOMAR during the study period, which almost covers a full annual cycle, and compare it with meteor radar, model and geostrophic wind data.

This is discussed in the replies to your main points and adjustments have accordingly been made to the manuscript

Need more discussion of how poor WIRA/meteor radar meridional is.

The time series of zonal and meridional wind profiles are shown in Figs. 9 and 10 along with bi-monthly average profiles of this data set in Figs. 11 and 12. The extent of the wind radiometer's error bars in Figs. 11 and 12 depends on the number of contributing measurement cycles at the respective altitude and on the signal-to-noise ratio of the wind signature in the recorded spectra. The latter is mainly determined by the opacity of the troposphere at the observation frequency which is highly influenced by its variable liquid water and water vapour content.

In the uppermost panel of Figs. 9 and 10, observations from the Andenes meteor radar are plotted alongside WIRA's winds. The altitude ranges classically covered by these instruments do not overlap but are rather adjacent, especially when the radiometer encounters good observation conditions. In these cases the hand-over from WIRA to the meteor radar is remarkably smooth without major jumps in the wind profiles. This behaviour is especially well illustrated for the rapidly changing meridional winds but it can similarly be discerned for the zonal component.

The ECMWF panel in Figs. 9 and 10 is shared by ERA5 before 31 December 2016 and forecast data afterwards. For a full intercomparison ECMWF's ERA5, its forecast and its operational analysis winds between 1 August and 31 December 2016 are reprinted in the Supplement's Fig S5 which confirms that they follow a very similar pattern. Notable differences between ECMWF forecast and ERA5 are, however, found in the zonal and meridional winds above 0.2 hPa for October - November 2016 (Figs. 11 and 12) which according to Fig. S5 are not related to the change of model cycle in the ECMWF forecasts on 22 November (before this date ECMWF forecast and ERA5 both ran on 41r2), but rather to ERA5 systematically featuring lower absolute zonal and meridional wind speeds at these altitudes.

The fundamental pattern of the time series in Figs. 9 and 10 is the same for all model data and the radiometer observations. However, some differences between the winds from the various data sources can be distinguished. For instance, the mesospheric westward wind above 0.2 hPa is substantially weaker in the ERA5 re-analysis and the ECMWF forecasts in comparison to WIRA, MERRA2 and the geostrophic wind computations from MLS in August 2016 which translates to a substantial bias in the upper part of the upper left panel of Fig. 11. SD-WACCM also features comparable wind speeds as the radiometer observations in August, but the strong mesospheric eastward winds around 28 Aug and 6 Sep, which could be artefacts, drive the bi-monthly average towards zero. Therefrom one might conclude that the advantages of high altitude input data (MERRA2 and MLS geostrophic wind) or high model tops (SD-WACCM) drive these models closer to the observations than ECMWF.

In the same panel stronger eastward winds of WIRA with respect to all comparison data can be distinguished below 0.4 hPa where they lie slightly outside the error bands. This is most probably related to the strong eastward winds measured by the radiometer on several consecutive days at the end of August which are not seen in this strength by any other source of comparison data. The reason for this difference could not be established and unluckily there are no lidar measurements at this time which could provide independent observational evidence.

SD-WACCM features substantially lower zonal wind speeds compared to all data sets and especially to the observations for October/November and December/January above 0.1 hPa. For Dec/Jan this tendency seems to be confirmed by the meteor radar wind whereas these are almost equally offset from the high-altitude radiometer and SD-WACCM data for Oct/Nov.

Finally, for February/March 2017 ECMWF forecasts, SD-WACCM and radiometer measurements are in close correspondence while MLS and the geostrophic winds have offsets of up to 7 m/s around 0.1 hPa. Besides these few exceptions the

agreement of the zonal wind from the different data sources in Fig. 11 is very good and the comparison data often lie within the error bars of the radiometer.

Regarding the meridional component, winds from all data sources agree with each other and are generally within the observation errors (Fig. 12) for almost all bi-monthly average periods. The only notable exceptions occur for SD-WACCM in April/May 2017 with offsets of up to 10 m/s and, more pronounced, in February/March 2017 when all comparison data suggest higher winds than observed by the radiometer above 0.2 hPa. Again, the spread between the model data is considerable with offsets between WIRA and ECMWF extending from 7 m/s at 0.1 hPa up to 12 m/s at 0.3 hPa while the difference between the observations and SD-WACCM remains below 3 m/s at all altitudes. In both panels the transition from the radiometer to the meteor radar wind profile is almost perfectly smooth justifying some trust in the radiometer observations. The difference pattern for February/March 2017 is obviously a related feature to what has been observed during the lidar intercomparisons in Fig. 7. When focusing on this period in the time series in Fig. 10 it appears that the two episodes of strong northward wind at the beginning and end of February extend to much higher altitudes in ECMWF than in WIRA data. A similar but reduced tendency is visible for MERRA2. However, the meteor radar observations during these periods seem to confirm the lower velocity meridional winds seen by the radiometer at high altitudes by also showing low adjacent velocities above 0.02 hPa.

In addition to the previously discussed long-term comparisons, interesting short-term events can be distinguished from the time series. One example shall briefly be discussed here: On 15 and 16 January 2017 a reversal of the zonal wind direction in the mesosphere is clearly visible in the microwave radiometer observations in Fig. 9 while the stratospheric winds remain at high eastward velocities. It appears that the transition from the WIRA to the meteor radar profiles is smooth also on these days with the meteor radar winds at the lowest levels also being reverted to westward direction. Moreover, a lidar observation in the night from 14 to 15 January corresponded very closely to the radiometer profile (see Fig. S3, second line/second column). Thus, there are good reasons to think of this inversion as a true atmospheric feature rather than a measurement artefact. MERRA2 and the geostrophic wind calculations from the MLS geopotential height feature a similar pattern as WIRA with a clear reversal of the zonal wind direction in the mesosphere. This change is not captured to its full extent by ECMWF's forecasts and SD-WACCM which only show a reduction in mesospheric wind speeds. Hence the feature is present in all data sets which are either direct observations or use observations from mesospheric altitudes (MLS) as base for the calculations or as assimilation data. The fact that it is not seen in ECMWF which only assimilates a few infrared temperature data and SD-WACCM which is completely free-running in the mesosphere may be interpreted as an indication that this effect is not captured by the model physics and solely exists when real observations are considered.

## 7 Conclusions

Following the recent developments of the wind measurement techniques of Doppler microwave radiometry and lidar iodine absorption spectroscopy two such instruments have been operated in co-location at Andenes (69.3° N, 16.0° E) for a 11 months intercomparison period. After Lübken et al. (2016) had found good correspondence of nighttime lidar winds with 8 rocket soundings, the present study can be regarded as the first thorough cross-instrumental validation of the new lidar and radiometry

techniques for wind observations in the upper stratosphere and lower mesosphere during night and day. The intercomparisons between winds from the microwave radiometer WIRA and the ALOMAR RMR lidar have demonstrated the quality of the new measurement techniques which appear to be largely bias-free. *except mesospheric meridional wind*

The comparison of the wind observations during sunlit periods prove that the ALOMAR RMR lidar can overcome the additional challenges for daylight operation. On the other hand, the nighttime observations can be used for retrievals presented in Rüfenacht and Kämpfer (2017) allow wind radiometry to obtain accurate wind profiles at night conditions. Especially the nighttime zonal winds are in very close agreement with all compared data sources while some differences in the meridional component appear above 0.3 hPa. It should however be noted that the overall nighttime averages of measurements in February 2017 so that this feature may also be due to a short period the model meridional winds were found to be equally scattered between the radiometer and the lidar profiles (ECMWF close to lidar, SD-WACCM close to WIRA, MERRA2 in between) above 0.3 hPa indicating no clear preference for either of the observations. Meanwhile the lowermost levels of meteor radar measurements closely correspond to the uppermost radiometer winds.

*large!* **This is discussed in our reply to your major points**

Except for the previously mentioned nighttime meridional winds above 0.3 hPa biases are mostly below 5 m/s and within the random errors of the observations and never exceed 10 m/s which is less than 10% of typical wind speeds for this altitude range. In addition to the good average agreement between lidar and radiometer it should be noted that also the temporal and altitude-dependent features in the time series correspond very well as discussed for the 187 hours of continuous lidar observations in February 2017.

In conclusion, the observational intercomparisons prove that middle-atmospheric winds from both instruments can be used as single validated standards when operated at different sites or as complements when in co-location. Indeed, Doppler radiometry for weather-independent continuous monitoring and lidar spectroscopy for high-resolution observations when conditions permit appear to be an ideal combination of measurement infrastructure.

The 11 months time series comparison of quasi-continuous data reveals that the transition from the highest WIRA levels to the lowermost radar recordings at around 0.02 hPa is smooth, especially also for the meridional winds in February and March 2017 where the largest discrepancies to the models exist. In general the agreement among the different investigated models and re-analyses and with the microwave radiometer observations is very good for zonal as well as for meridional wind. Nevertheless, examples of pronounced short-term discrepancies between all models and the agreeing radiometer and lidar measurements have been identified.

The most prominent long-term bias has been found in August 2016 when the westward wind speeds above 0.2 hPa are underestimated by ECMWF's forecast data and ERA5 re-analyses by up to 10 m/s with respect to the radiometer measurements, whereas MERRA2 is in close agreement. To elucidate this difference we aim to target wind radiometer observations to future summers and autumn equinox transitions at high or mid latitudes, a period which had previously been discounted in view of the rapidly changing winter dynamics.

*Should mention often large meteor radar differences*

**This is discussed in our reply to your major points**

*Data availability.* ERA5 as well as forecasts and operational analyses from ECMWF are available at <https://www.ecmwf.int/en/forecasts/datasets>, while MERRA2 re-analysis data can be obtained from [https://gmao.gsfc.nasa.gov/re-analysis/MERRA-2/data\\_access](https://gmao.gsfc.nasa.gov/re-analysis/MERRA-2/data_access). The temperature profiles from MLS used for the calculation of the geostrophic wind field are available at <https://mls.jpl.nasa.gov>. The lidar, wind radiometer and meteor radar observations as well as the computations of geostrophic wind and the SD-WACCM simulations can be made available upon request.

5  
This seems important enough it should be done in a  
[Appendix A: Validation of mesopause region wind retrievals by WIRA against meteor radar] separate study

Rüfenacht and Kämpfer (2017) proposed to exploit the signals recorded by ground-based microwave radiometers operated at ozone emission frequencies to obtain wind information from the mesopause region. Thanks to the co-location of the wind radiometer WIRA with the Andenes meteor radar the reliability of this approach can be investigated.

10 It should be noted that microwave radiometry at these altitudes has some limitations: First of all, observations are only possible at times for which enough emitters (i.e. ozone molecules) are present. This is typically the case during nighttime so that at polar latitudes the retrieval of information about this altitudes is not possible during summer. Moreover, the exact altitude of the signal can not be determined by the effect of pressure broadening as the linewidth of the emission spectrum at such low pressures is largely dominated by Doppler broadening. This implies that, unlike in the USLM, it is impossible to  
15 distinguish signals from different altitudes by their spectral shape. Thus, the attribution of the retrieved wind information to a certain altitude becomes highly dependent on the accuracy of the vertical distribution of the mesopause region ozone in the a priori information. In contrast, meteor radars are specifically designed for observations in the mesopause region and are thus expected to deliver more reliable wind estimates.

Figure 13 presents the zonal and meridional wind observed by WIRA and the Andenes meteor radar during the winter months  
20 of 2016/17. It demonstrates that the mesopause region wind observations by WIRA follow a similar pattern as the meteor radar winds, especially for the convolved version. The convolving here not only accounts for the different altitude resolution of the wind radiometer, but, by doing so, also mitigates the effect of possibly inaccurate altitude attributions of the signal as here WIRA's vertical resolution is basically equivalent to the vertical extent of the secondary ozone maximum. From the validation example provided here it may be concluded that in the absence of dedicated co-located instruments for mesopause region wind  
25 measurements nighttime wind radiometer data can be used as a source of information for this altitude range.

This may indeed be pursued in a future study if the scientific question would benefit from such measurements. However, as this is a validation paper we are convinced that a first validation of this previously proposed mesopause region wind retrievals well fits the scope of this paper. We agree that it is not the main aim which clearly is on the USLM, therefore we place it in the appendix

*Competing interests.* The authors declare that they have no conflict of interest.

*Acknowledgements.* This work has been funded by the Swiss National Science Foundation grants P2BEP3-165383 and 200020-160048. Moreover the observational part has been supported by the European Union's Horizon 2020 Research and Innovation programme under grant agreement No. 653980 (ARISE2) and by the German Federal Ministry of Education and Research through the program Role Of The  
30 Middle atmosphere In Climate (ROMIC) initiative GW-LCYCLE. We acknowledge ECMWF for the ERA5, the forecasts and the operational

analysis data, NASA for the MERRA2 and the Aura MLS data as well as the NCAR CESM working group for providing the SD-WACCM model code.

## References

- Baldwin, M. P. and Dunkerton, T. J.: Stratospheric harbingers of anomalous weather regimes, *Science*, 294, 581–584, <https://doi.org/10.1126/science.1063315>, 2001.
- Baron, P., Murtagh, D. P., Urban, J., Sagawa, H., Ochiai, S., Kasai, Y., Kikuchi, K., Khosrawi, F., Körnich, H., Mizobuchi, S., Sagi, K., and  
5 Yasui, M.: Observation of horizontal winds in the middle-atmosphere between 30° S and 55° N during the northern winter 2009-2010, *Atmos. Chem. Phys.*, 13, 6049–6064, <https://doi.org/10.5194/acp-13-6049-2013>, 2013.
- Baron, P., Manago, N., Ozeki, H., Irimajiri, Y., Murtagh, D., Uzawa, Y., Ochiai, S., Shiotani, M., and Suzuki, M.: Measurement of stratospheric and mesospheric winds with a submillimeter wave limb sounder: results from JEM/SMILES and simulation study for SMILES-2, *Proc. SPIE*, 9639, 96 390N–1 – 96 390N–20, <https://doi.org/10.1117/12.2194741>, 2015.
- 10 Baumgarten, G.: Doppler Rayleigh/Mie/Raman lidar for wind and temperature measurements in the middle atmosphere up to 80 km, *Atmos. Meas. Tech.*, 3, 1509–1518, <https://doi.org/10.5194/amt-3-1509-2010>, 2010.
- Baumgarten, G., Fiedler, J., Hildebrand, J., and Lübken, F.-J.: Inertia gravity wave in the stratosphere and mesosphere observed by Doppler wind and temperature lidar, *Geophys. Res. Lett.*, 42, 10,929–10,936, <https://doi.org/10.1002/2015GL066991>, 2015GL066991, 2015.
- Dragani, R. and McNally, A. P.: Operational assimilation of ozone-sensitive infrared radiances at ECMWF, *Q. J. R. Meteorol. Soc.*, 139,  
15 2068–2080, <https://doi.org/10.1002/qj.2106>, 2013.
- ECMWF: <http://www.ecmwf.int/en/forecasts/documentation-and-support/changes-ecmwf-model>, accessed 12 Aug 2017, 2017.
- Fernandez, S., Rüfenacht, R., Kämpfer, N., Portafaix, T., Posny, F., and Payen, G.: Results from the validation campaign of the ozone radiometer GROMOS-C at the NDACC station of Réunion island, *Atmos. Chem. Phys.*, 16, 7531–7543, <https://doi.org/10.5194/acp-16-7531-2016>, 2016.
- 20 Fleming, E. L., Chandra, S., Barnett, J., and Corney, M.: Zonal mean temperature, pressure, zonal wind and geopotential height as functions of latitude, *Adv. Space Res.*, 10, 11 – 59, [https://doi.org/http://dx.doi.org/10.1016/0273-1177\(90\)90386-E](https://doi.org/http://dx.doi.org/10.1016/0273-1177(90)90386-E), 1990.
- Forkman, P., Eriksson, P., Winnberg, A., Garcia, R. R., and Kinnison, D.: Longest continuous ground-based measurements of mesospheric CO, *Geophys. Res. Lett.*, 30, <https://doi.org/10.1029/2003GL016931>, 1532, 2003.
- Fritts, D. C., Iimura, H., Lieberman, R., Janches, D., and Singer, W.: A conjugate study of mean winds and planetary waves employing enhanced meteor radars at Rio Grande, Argentina (53.8°S) and Juliusruh, Germany (54.6°N), *J. Geophys. Res.-Atmos.*, 117,  
25 <https://doi.org/10.1029/2011JD016305>, 2012.
- Froidevaux, L., Livesey, N. J., Read, W. G., Jiang, Y. B., Jimenez, C., Filipiak, M. J., Schwartz, M. J., Santee, M. L., Pumphrey, H. C., Jiang, J. H., Wu, D. L., Manney, G. L., Drouin, B. J., Waters, J. W., Fetzer, E. J., Bernath, P. F., Boone, C. D., Walker, K. A., Jucks, K. W., Toon, G. C., Margitan, J. J., Sen, B., Webster, C. R., Christensen, L. E., Elkins, J. W., Atlas, E., Lueb, R. A., and Hendershot,  
30 R.: Early validation analyses of atmospheric profiles from EOS MLS on the aura Satellite, *IEEE T. Geosci. Remote*, 44, 1106–1121, <https://doi.org/10.1109/TGRS.2006.864366>, 2006.
- Garfinkel, C. I., Son, S.-W., Song, K., Aquila, V., and Oman, L. D.: Stratospheric variability contributed to and sustained the recent hiatus in Eurasian winter warming, *Geophys. Res. Lett.*, 44, 374–382, <https://doi.org/10.1002/2016GL072035>, 2017.
- Gelaro, R., McCarty, W., Suárez, M. J., Todling, R., Molod, A., Takacs, L., Randles, C. A., Darmenov, A., Bosilovich, M. G., Reichle, R.,  
35 Wargan, K., Coy, L., Cullather, R., Draper, C., Akella, S., Buchard, V., Conaty, A., da Silva, A. M., Gu, W., Kim, G.-K., Koster, R., Lucchesi, R., Merkova, D., Nielsen, J. E., Partyka, G., Pawson, S., Putman, W., Rienecker, M., Schubert, S. D., Sienkiewicz, M., and

- Zhao, B.: The Modern-Era Retrospective Analysis for Research and Applications, Version 2 (MERRA-2), *J. Climate*, 30, 5419–5454, <https://doi.org/10.1175/JCLI-D-16-0758.1>, 2017.
- Hagen, J.: Design and characterisation of a compact 142-GHz-radiometer for middle-atmospheric wind measurements, Master's thesis, Faculty of Science, University of Bern, Bern, Switzerland, 2015.
- 5 Hersbach, H. and Dee, D.: ERA5 reanalysis is in production, *ECMWF Newsletter*, p. 7, 2016.
- Hildebrand, J., Baumgarten, G., Fiedler, J., Hoppe, U.-P., Kaifler, B., Lübken, F.-J., and Williams, B. P.: Combined wind measurements by two different lidar instruments in the Arctic middle atmosphere, *Atmos. Meas. Tech.*, 5, 2433–2445, <https://doi.org/10.5194/amt-5-2433-2012>, 2012.
- Hildebrand, J., Baumgarten, G., Fiedler, J., and Lübken, F.-J.: Winds and temperatures of the Arctic middle atmosphere during January  
10 measured by Doppler lidar, *Atmos. Chem. Phys. Discuss.*, 2017, 1–23, <https://doi.org/10.5194/acp-2017-167>, 2017.
- Hocking, W. K., Fuller, B., and Vandepeer, B.: Realtime determination of meteor-related parameters utilizing modern digital technology, *J. Atmos. Sol.-Terr. Phys.*, 69(2-3), 155–169, [https://doi.org/10.1016/S1364-6826\(00\)00138-3](https://doi.org/10.1016/S1364-6826(00)00138-3), 2001a.
- Imura, H., Fritts, D. C., Janches, D., Singer, W., and Mitchell, N. J.: Interhemispheric structure and variability of the 5-day planetary wave from meteor radar wind measurements, *Ann. Geophys.*, 33, 1349–1359, <https://doi.org/10.5194/angeo-33-1349-2015>, 2015.
- 15 Jacobi, C.: Meteor radar measurements of mean winds and tides over Collm (51.3° N, 13° E) and comparison with LF drift measurements 2005–2007, *Adv. Radio Sci.*, 9, 335–341, <https://doi.org/10.5194/ars-9-335-2011>, 2011.
- Kidston, J., Scaife, A. A., Hardiman, S. C., Mitchell, D. M., Butchart, N., Baldwin, M. P., and Gray, L. J.: Stratospheric influence on tropospheric jet streams, storm tracks and surface weather, *Nat. Geosci.*, 8, 433–440, <https://doi.org/10.1038/ngeo2424>, 2015.
- Kishore Kumar, G., Kishore Kumar, K., Baumgarten, G., and Ramkumar, G.: Validation of MERRA reanalysis upper-level winds over low  
20 latitudes with independent rocket sounding data, *J. Atmos. Sol.-Terr. Phys.*, 123, 48 – 54, <https://doi.org/10.1016/j.jastp.2014.12.001>, 2015.
- Kunz, a., Pan, L. L., Konopka, P., Kinnison, D. E., and Tilmes, S.: Chemical and dynamical discontinuity at the extratropical tropopause based on START08 and WACCM analyses, *J. Geophys. Res.-Atmos.*, 116, 1–15, <https://doi.org/10.1029/2011JD016686>, 2011.
- Lamarque, J.-F., Emmons, L. K., Hess, P. G., Kinnison, D. E., Tilmes, S., Vitt, F., Heald, C. L., Holland, E. A., Lauritzen, P. H., Neu, J., Orlando, J. J., Rasch, P. J., and Tyndall, G. K.: CAM-chem: description and evaluation of interactive atmospheric chemistry in the  
25 Community Earth System Model, *Geosci. Model Dev.*, 5, 369–411, <https://doi.org/10.5194/gmd-5-369-2012>, 2012.
- Livesey, N. J., Read, W. G., Wagner, P. A., Froidevaux, L., Lambert, A., Manney, G. L., Millan, L., Pumphrey, H. C., Santee, M. L., Schwartz, M. J., Wang, S., Fuller, R. A., Jarnot, R. F., Knosp, B., and Martinez, E.: EOS MLS Version 4.2x Level 2 data quality and description document, Jet Propulsion Laboratory, California Institute of Technology, Pasadena, CA, 2015.
- Lobsiger, E.: Ground-based microwave radiometry to determine stratospheric and mesospheric ozone profiles, *J. Atmos. Terr. Phys.*, 49,  
30 493–501, [https://doi.org/10.1016/0021-9169\(87\)90043-2](https://doi.org/10.1016/0021-9169(87)90043-2), 1987.
- Lübken, F.-J., Baumgarten, G., Hildebrand, J., and Schmidlin, F. J.: Simultaneous and co-located wind measurements in the middle atmosphere by lidar and rocket-borne techniques, *Atmos. Meas. Tech.*, 9, 3911–3919, <https://doi.org/10.5194/amt-9-3911-2016>, 2016.
- Marsh, D. R., Mills, M. J., Kinnison, D. E., Lamarque, J.-F., Calvo, N., and Polvani, L. M.: Climate Change from 1850 to 2005 Simulated in CESM1(WACCM), *J. Climate*, 26, 7372–7391, <https://doi.org/10.1175/JCLI-D-12-00558.1>, 2013.
- 35 McCormack, J., Hoppel, K., Kuhl, D., de Wit, R., Stober, G., Espy, P., Baker, N., Brown, P., Fritts, D., Jacobi, C., Janches, D., Mitchell, N., Ruston, B., Swadley, S., Viner, K., Whitcomb, T., and Hibbins, R.: Comparison of mesospheric winds from a high-altitude meteorological analysis system and meteor radar observations during the boreal winters of 2009–2010 and 2012–2013, *J. Atmos. Sol.-Terr. Phys.*, 154, 132–166, <https://doi.org/10.1016/j.jastp.2016.12.007>, 2017.

- Molod, A., Takacs, L., Suarez, M., and Bacmeister, J.: Development of the GEOS-5 atmospheric general circulation model: evolution from MERRA to MERRA2, *Geosci. Model Dev.*, 8, 1339–1356, <https://doi.org/10.5194/gmd-8-1339-2015>, 2015.
- National Research Council: United States Space Science Program: Report to COSPAR, Ninth Meeting, National Academy of Sciences, 1966.
- Nedoluha, G. E., Bevilacqua, R. M., Gomez, R. M., Thacker, D. L., Waltman, W. B., and Pauls, T. A.: Ground-based measurements of water vapor in the middle atmosphere, *J. Geophys. Res.-Atmos.*, 100, 2927–2939, <https://doi.org/10.1029/94JD02952>, 1995.
- Palm, M., Hoffmann, C. G., Golchert, S. H. W., and Notholt, J.: The ground-based MW radiometer OZORAM on Spitsbergen – description and status of stratospheric and mesospheric O<sub>3</sub>-measurements, *Atmos. Meas. Tech.*, 3, 1533–1545, <https://doi.org/10.5194/amt-3-1533-2010>, 2010.
- Reid, I. M.: MF and HF radar techniques for investigating the dynamics and structure of the 50 to 110 km height region: a review, *Prog. Earth Planet. Sci.*, 2, <https://doi.org/10.1186/s40645-015-0060-7>, 2015.
- Richter, J. H., Sassi, F., and Garcia, R. R.: Toward a Physically Based Gravity Wave Source Parameterization in a General Circulation Model, *J. Atmos. Sci.*, 67, 136–156, <https://doi.org/10.1175/2009JAS3112.1>, 2010.
- Rodgers, C. D.: Inverse methods for atmospheric sounding : theory and practice, vol. 2 of *Series on atmospheric, oceanic and planetary physics*, World Scientific, Singapore, reprint 2008, 2000.
- Rüfenacht, R. and Kämpfer, N.: The importance of signals in the Doppler broadening range for middle-atmospheric microwave and ozone radiometry, *J. Quant. Spec. Ra.*, 199, 77 – 88, <https://doi.org/10.1016/j.jqsrt.2017.05.028>, 2017.
- Rüfenacht, R., Murk, A., Kämpfer, N., Eriksson, P., and Buehler, S. A.: Middle-atmospheric zonal and meridional wind profiles from polar, tropical and midlatitudes with the ground-based microwave Doppler wind radiometer WIRA, *Atmos. Meas. Tech.*, 7, 4491–4505, <https://doi.org/10.5194/amt-7-4491-2014>, 2014.
- Rüfenacht, R., Kämpfer, N., and Murk, A.: First middle-atmospheric zonal wind profile measurements with a new ground-based microwave Doppler-spectro-radiometer, *Atmos. Meas. Tech.*, 5, 2647–2659, <https://doi.org/10.5194/amt-5-2647-2012>, 2012.
- Scaife, A. A., Folland, C. K., Alexander, L. V., Moberg, A., and Knight, J. R.: European Climate Extremes and the North Atlantic Oscillation, *J. Climate*, 21, 72–83, <https://doi.org/10.1175/2007JCLI1631.1>, 2008.
- Schwartz, M. J., Lambert, A., Manney, G. L., Read, W. G., Livesey, N. J., Froidevaux, L., Ao, C. O., Bernath, P. F., Boone, C. D., Cofield, R. E., Daffer, W. H., Drouin, B. J., Fetzer, E. J., Fuller, R. A., Jarnot, R. F., Jiang, J. H., Jiang, Y. B., Knosp, B. W., Krüger, K., Li, J.-L. F., Mlynczak, M. G., Pawson, S., Russell, J. M., Santee, M. L., Snyder, W. V., Stek, P. C., Thurstans, R. P., Tompkins, A. M., Wagner, P. A., Walker, K. A., Waters, J. W., and Wu, D. L.: Validation of the Aura Microwave Limb Sounder temperature and geopotential height measurements, *J. Geophys. Res.-Atmos.*, 113, <https://doi.org/10.1029/2007JD008783>, 2008.
- Stober, G., Matthias, V., Jacobi, C., Wilhelm, S., J., H., and Chau, J. L.: Exceptionally strong summer-like zonal wind reversal in the upper mesosphere during winter 2015/16, *Ann. Geophys.*, 35, 711–720, <https://doi.org/10.5194/angeo-35-711-2017>, 2017.
- Waters, J., Froidevaux, L., Harwood, R., Jarnot, R., Pickett, H., Read, W., Siegel, P., Cofield, R., Filipiak, M., Flower, D., Holden, J., Lau, G., Livesey, N., Manney, G., Pumphrey, H., Santee, M., Wu, D., Cuddy, D., Lay, R., Loo, M., Perun, V., Schwartz, M., Stek, P., Thurstans, R., Boyles, M., Chandra, K., Chavez, M., Chen, G., Chudasama, B., Dodge, R., Fuller, R., Girard, M., Jiang, J., Jiang, Y., Knosp, B., LaBelle, R., Lam, J., Lee, K., Miller, D., Oswald, J., Patel, N., Pukala, D., Quintero, O., Scaff, D., Van Snyder, W., Tope, M., Wagner, P., and Walch, M.: The Earth Observing System Microwave Limb Sounder (EOS MLS) on the Aura satellite, *IEEE T. Geosci. Remote*, 44, 1075–1092, <https://doi.org/10.1109/TGRS.2006.873771>, 2006.
- Wilhelm, S., Stober, G., and Chau, J. L.: A comparison of 11-year mesospheric and lower thermospheric winds determined by meteor and MF radar at 69°N, *Ann. Geophys.*, 35, 893–906, <https://doi.org/10.5194/angeo-35-893-2017>, 2017.

Yan, Z., Hu, X., Guo, W., Guo, S., Cheng, Y., Gong, J., and Yue, J.: Development of a mobile Doppler lidar system for wind and temperature measurements at 30–70 km, *J. Quant. Spectrosc. Ra.*, 188, 52 – 59, <https://doi.org/10.1016/j.jqsrt.2016.04.024>, *Advances in Atmospheric Light Scattering: Theory and Remote Sensing Techniques*, 2017.

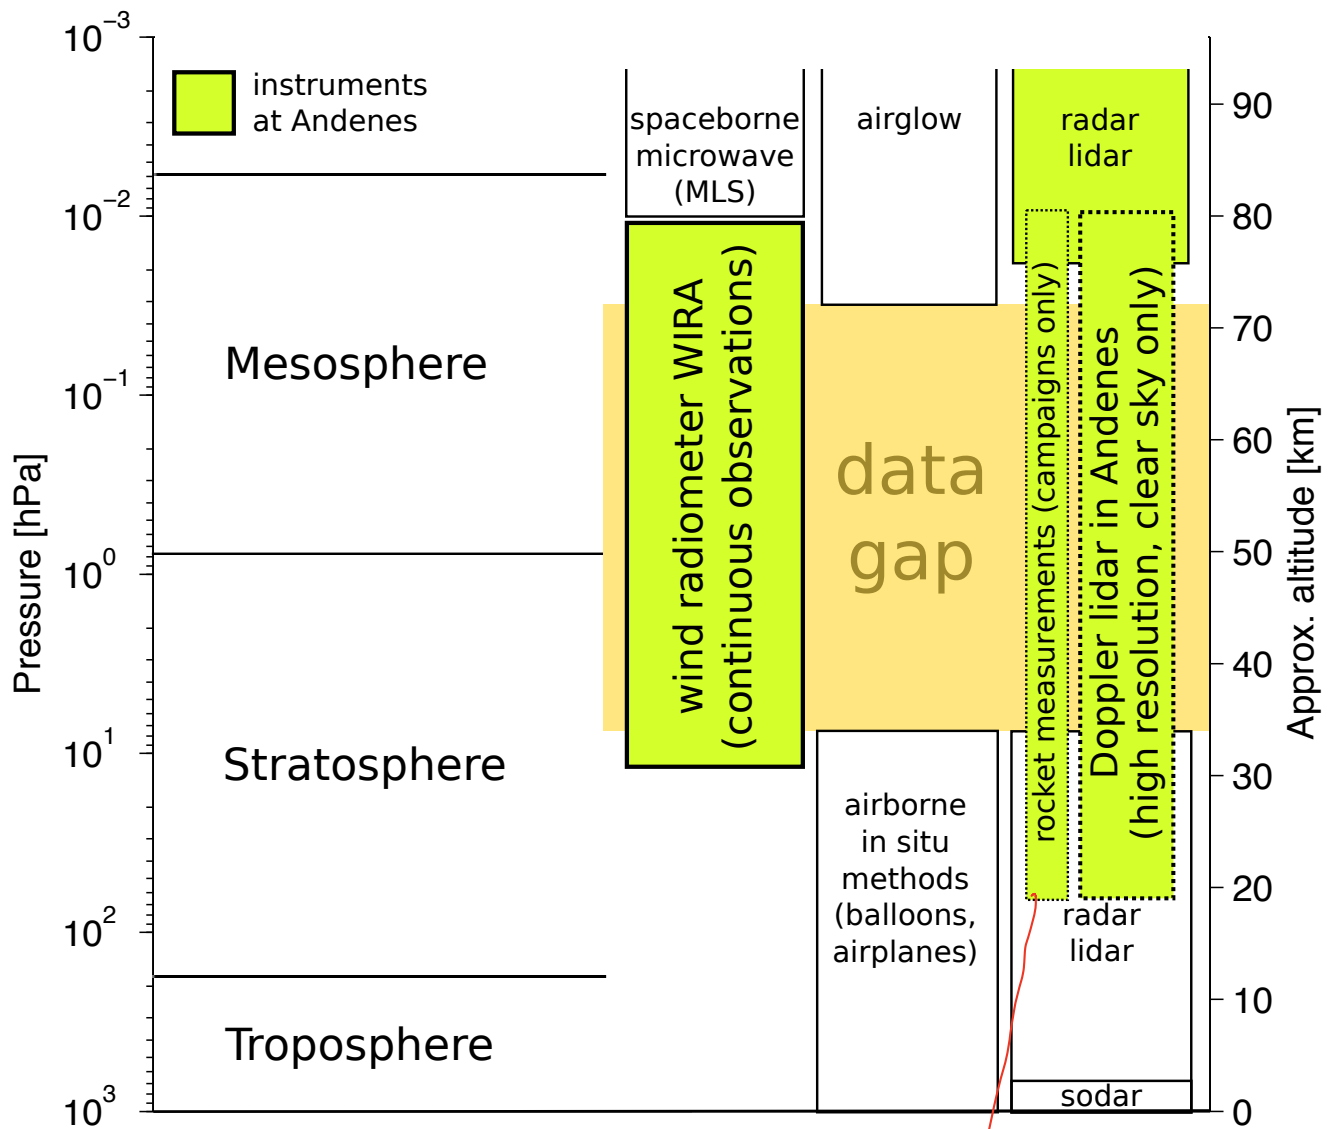

**Figure 1.** Overview of the altitude coverage of the currently operational wind measurement techniques. The techniques which are available at Andenes (69.3° N, 16.0° E), the observation site of the present study, are highlighted.

Chemical release  
Rockets can go  
into the F region

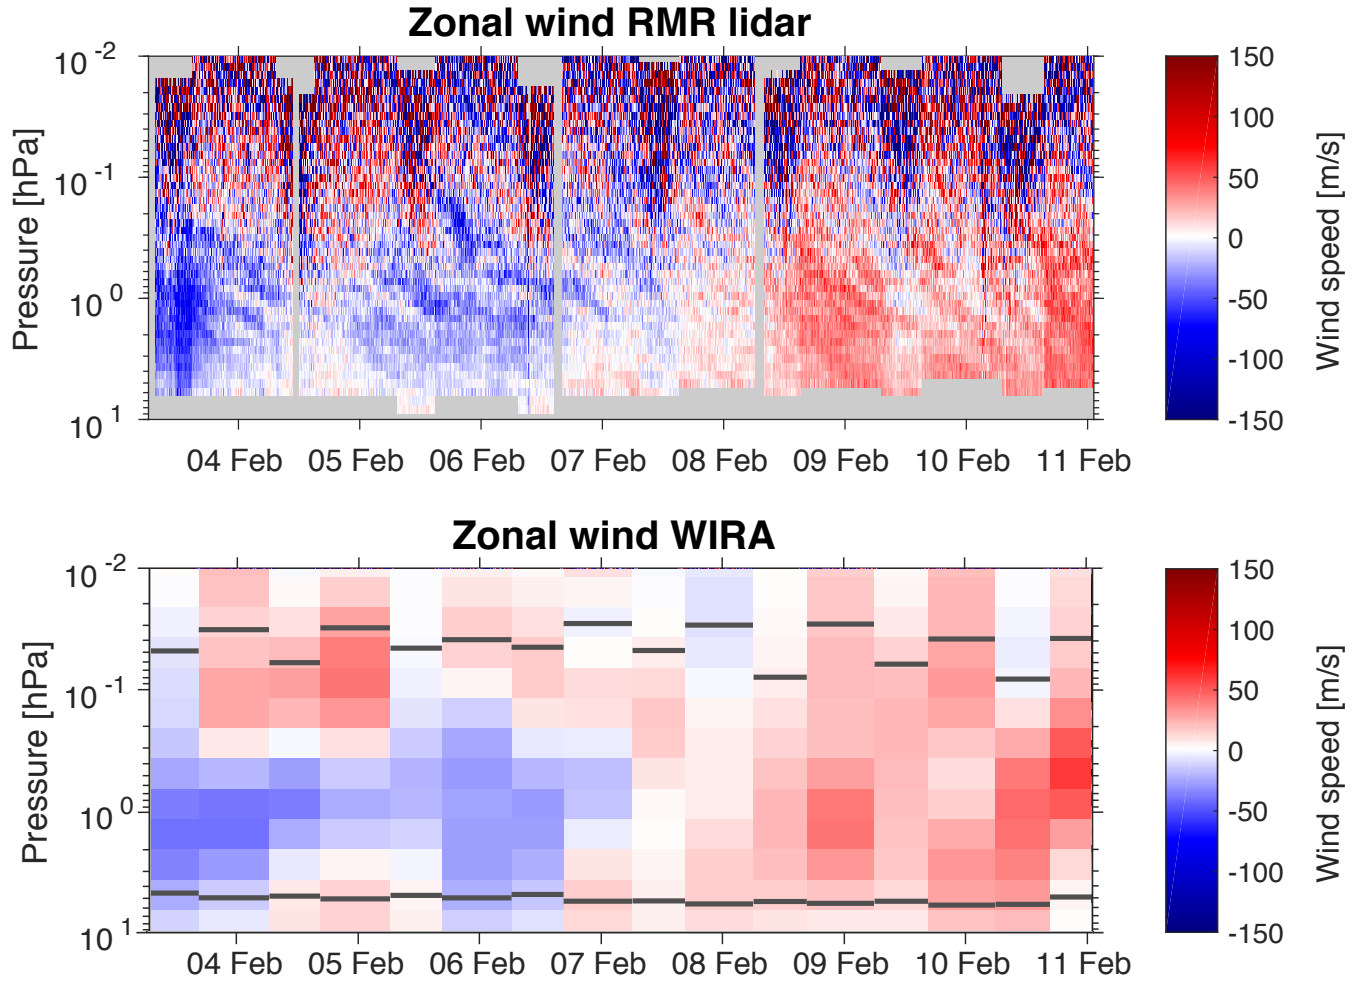

**Figure 2.** Time series of zonal wind during 187.1 hours of coincident lidar and radiometer measurements recorded at Andenes from 3 to 11 February 2017. For better visibility the lidar data are binned to 1 km vertical resolution while the temporal resolution is 5 minutes. The trustworthy altitude range of the wind radiometer data, according to the definition given in Sect. 2.1, is marked by the horizontal dark grey lines. Data outside this range should not be considered as it may substantially be affected by a priori assumptions. All times are expressed in Coordinated Universal Time (UTC) with the ticks at 00:00.

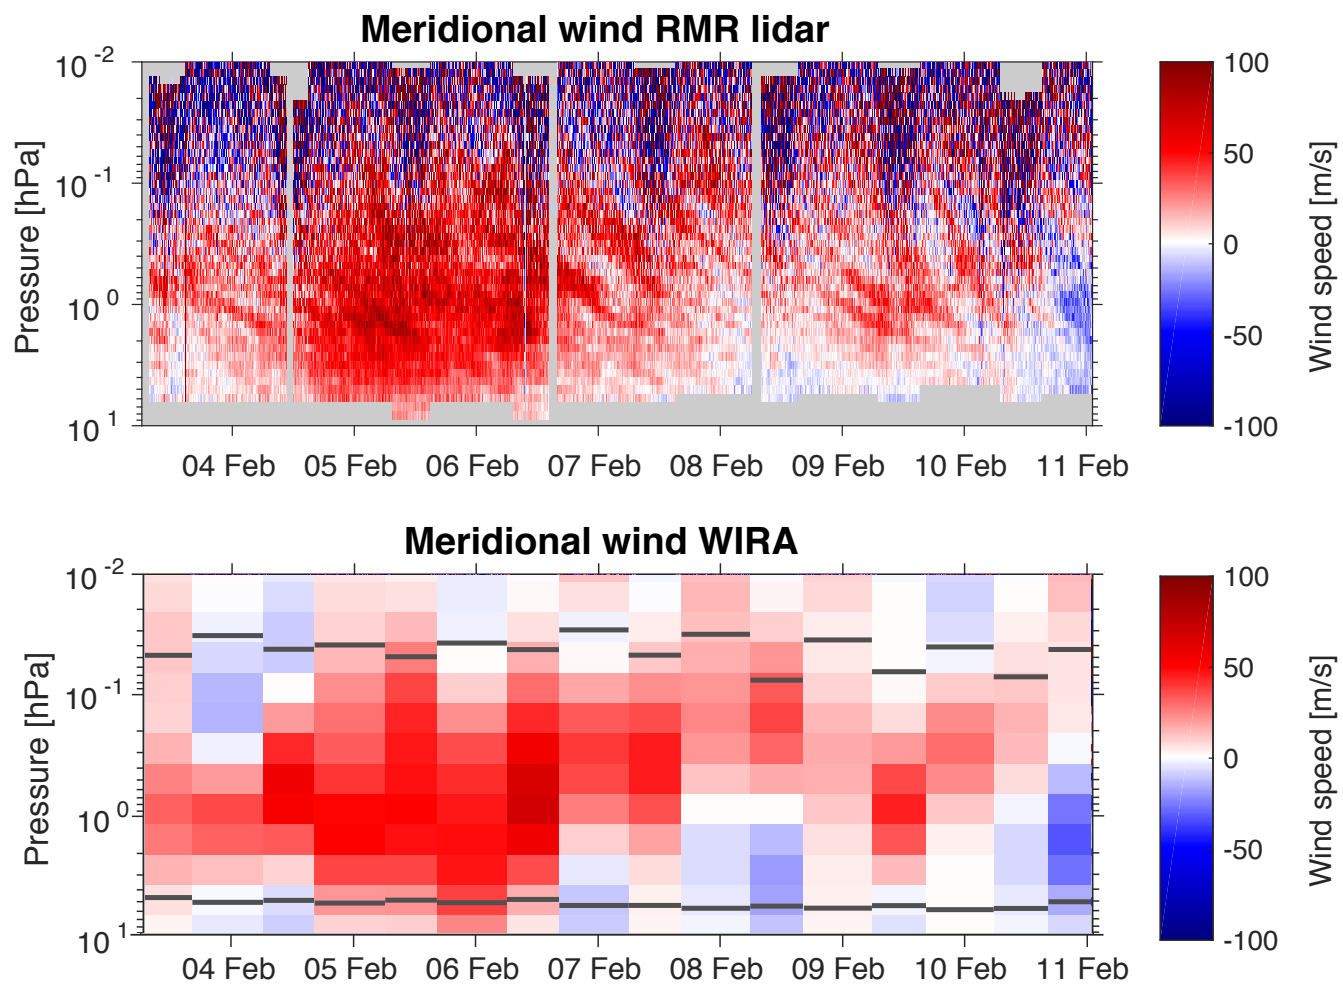

**Figure 3.** As Fig. 2 but for the meridional wind component.

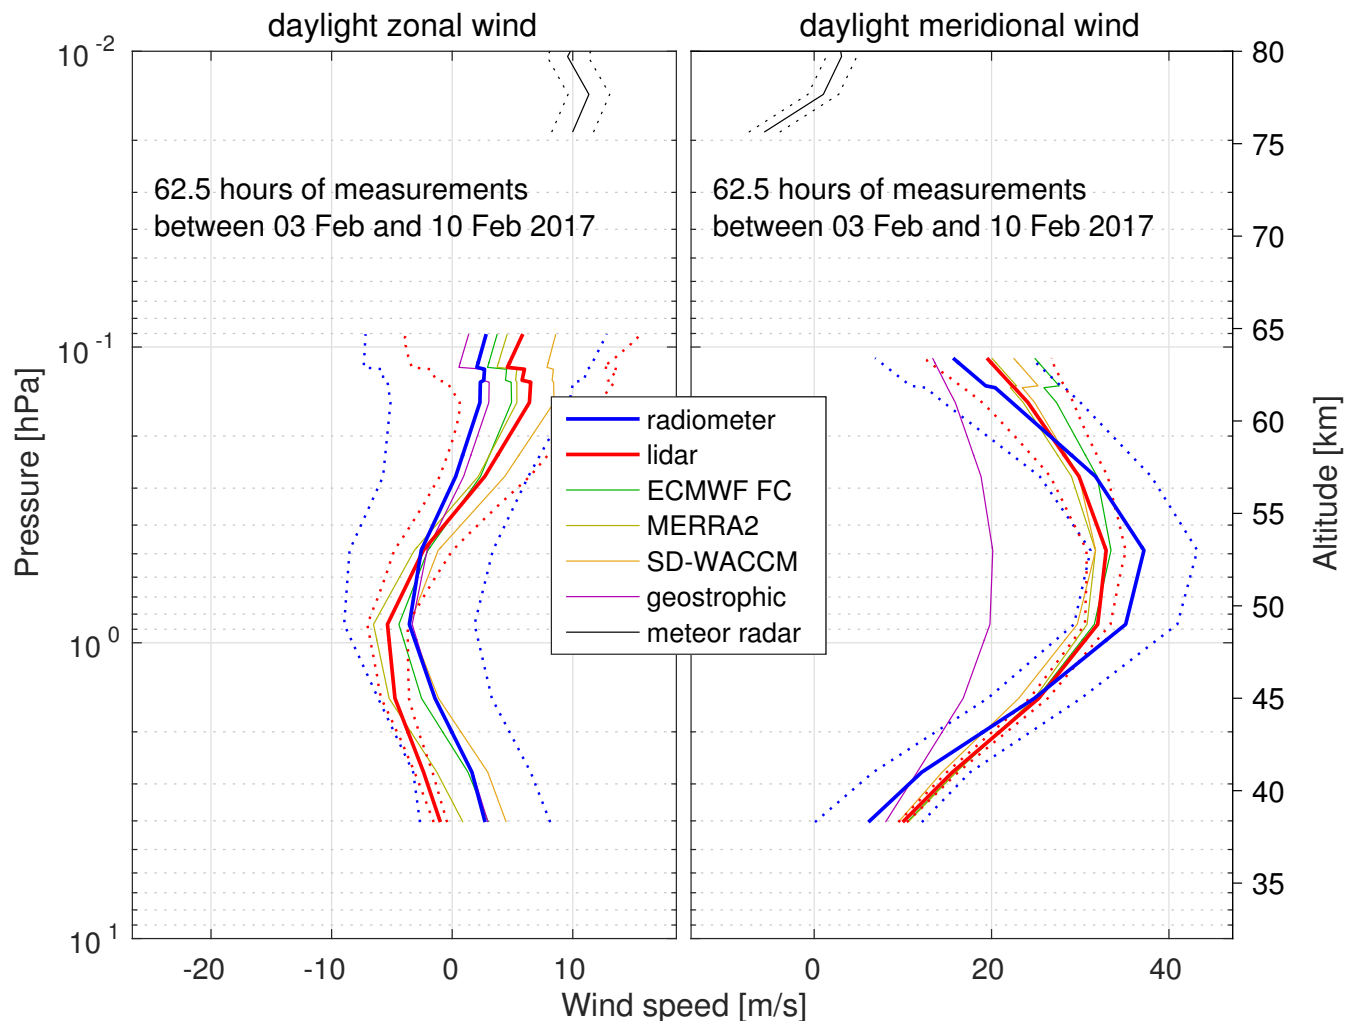

**Figure 4.** Mean daytime zonal and meridional wind profiles for the observation period 3-11 February 2017 measured by the wind radiometer WIRA and the RMR lidar in comparison with models, re-analyses and geostrophic wind calculations from MLS geopotential heights. All middle-atmospheric comparison data have been convolved with WIRA's averaging kernels according to Eq. (2) and cut at the limits of the trustworthy altitude range of the coincident radiometer observation. The discontinuities in the profiles visible at the uppermost altitudes originate from the averaging over observations with slightly different altitude coverage. At the uppermost altitudes the simultaneous observations from the meteor radar (not convolved) are shown. The random errors of all measurement data are denoted by dotted lines. Only data from times when lidar and radiometer were both operated in their respective daylight mode have been considered in this plot.

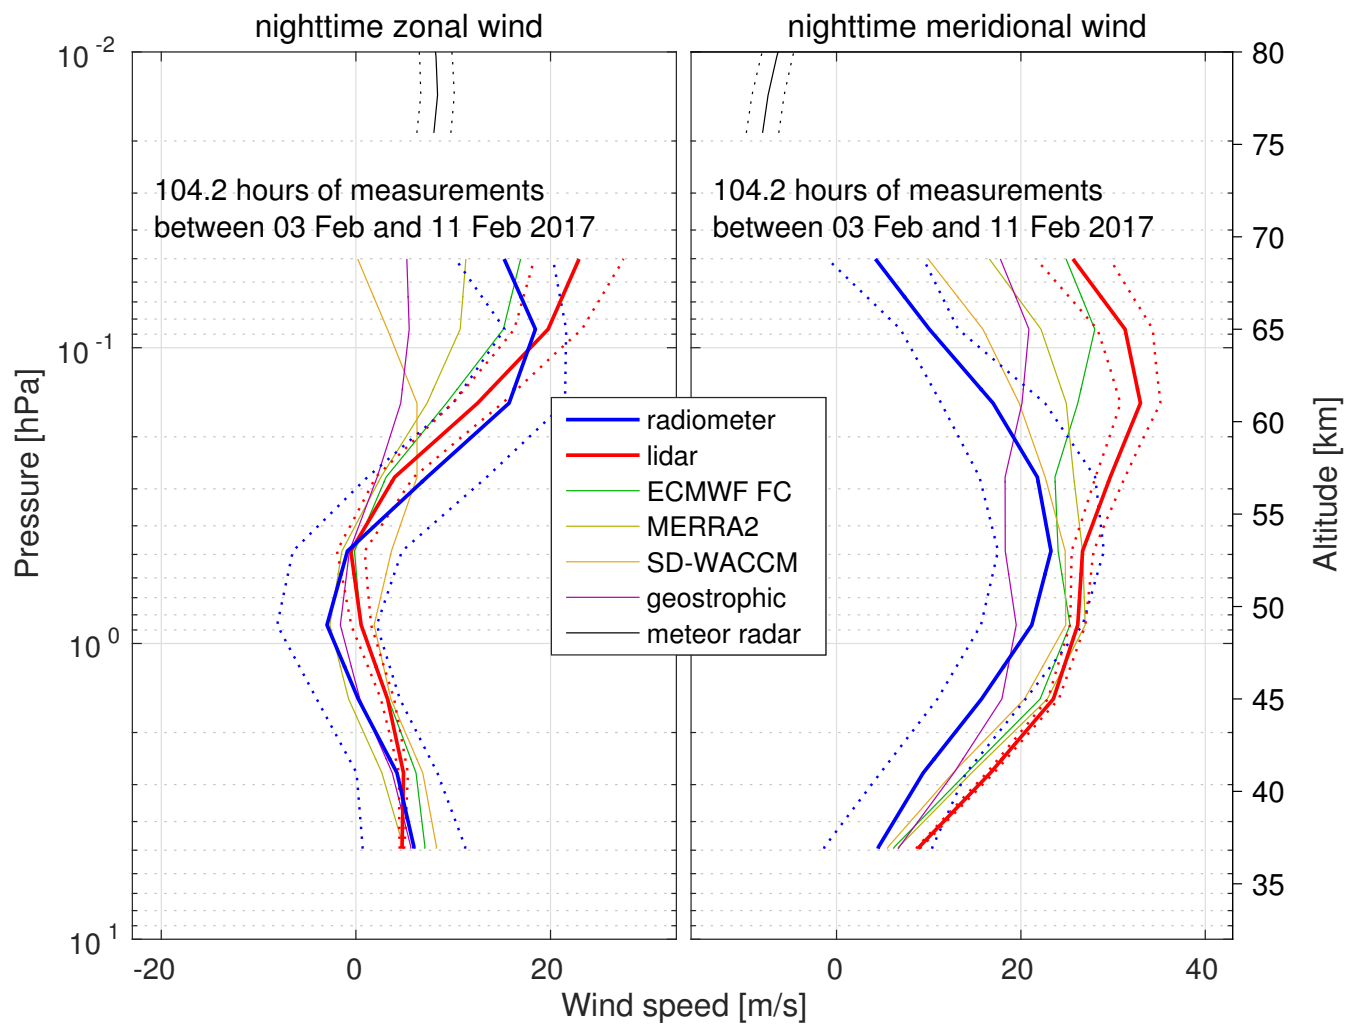

**Figure 5.** As Fig. 4 but for data from the time period when both instruments were operated in their respective night mode.

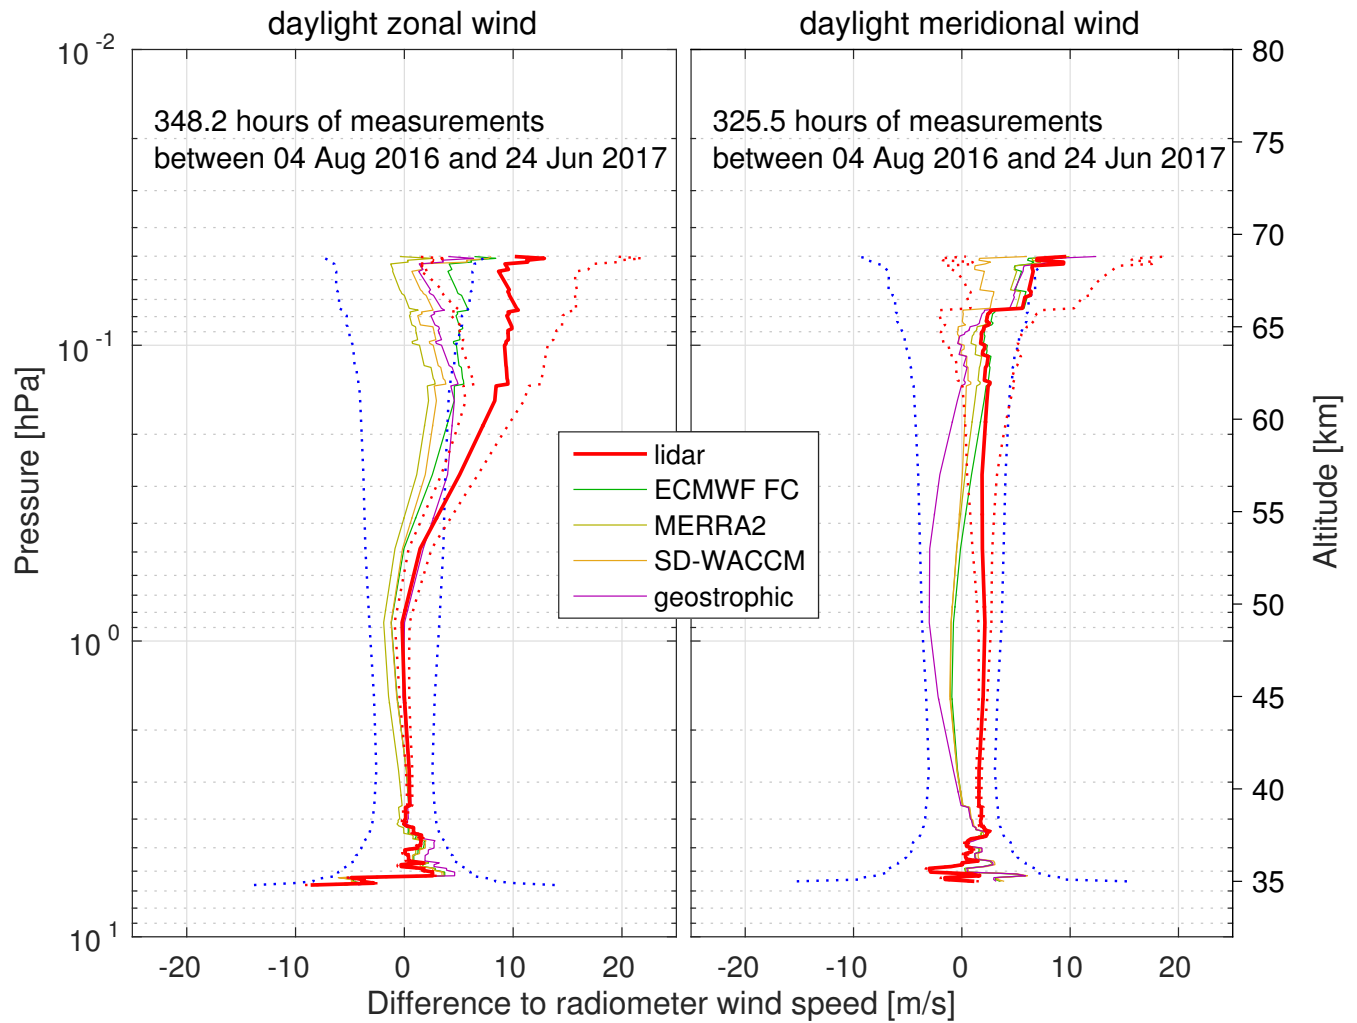

**Figure 6.** Mean difference of all convolved daytime zonal and meridional wind profiles from models, re-analyses, MLS geostrophic winds and the RMR lidar to the observations from WIRA recorded during the entire intercomparison campaign. The bands of random errors of the radiometer and the lidar observations are denoted by blue and red dotted lines, respectively. The discontinuities in the profiles visible at the upper and lowermost altitudes originate from the averaging over observations with different altitude coverage. Only data from the time period when both instruments were operated in their respective daylight mode have been considered.

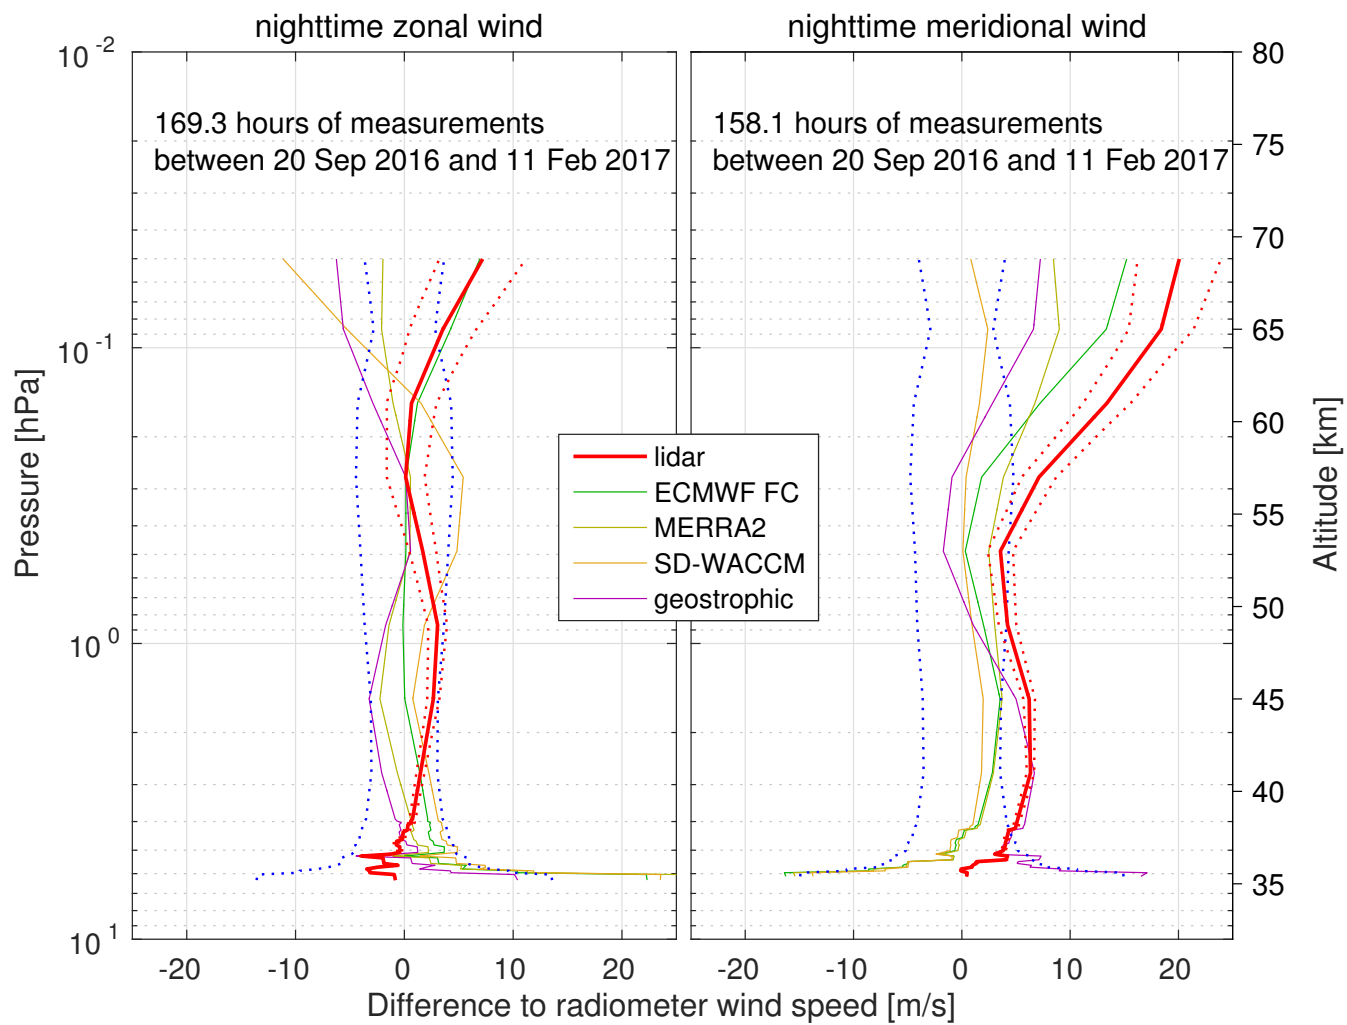

**Figure 7.** As Fig. 6 but for data from the time period when both instruments were operated in their respective night mode.

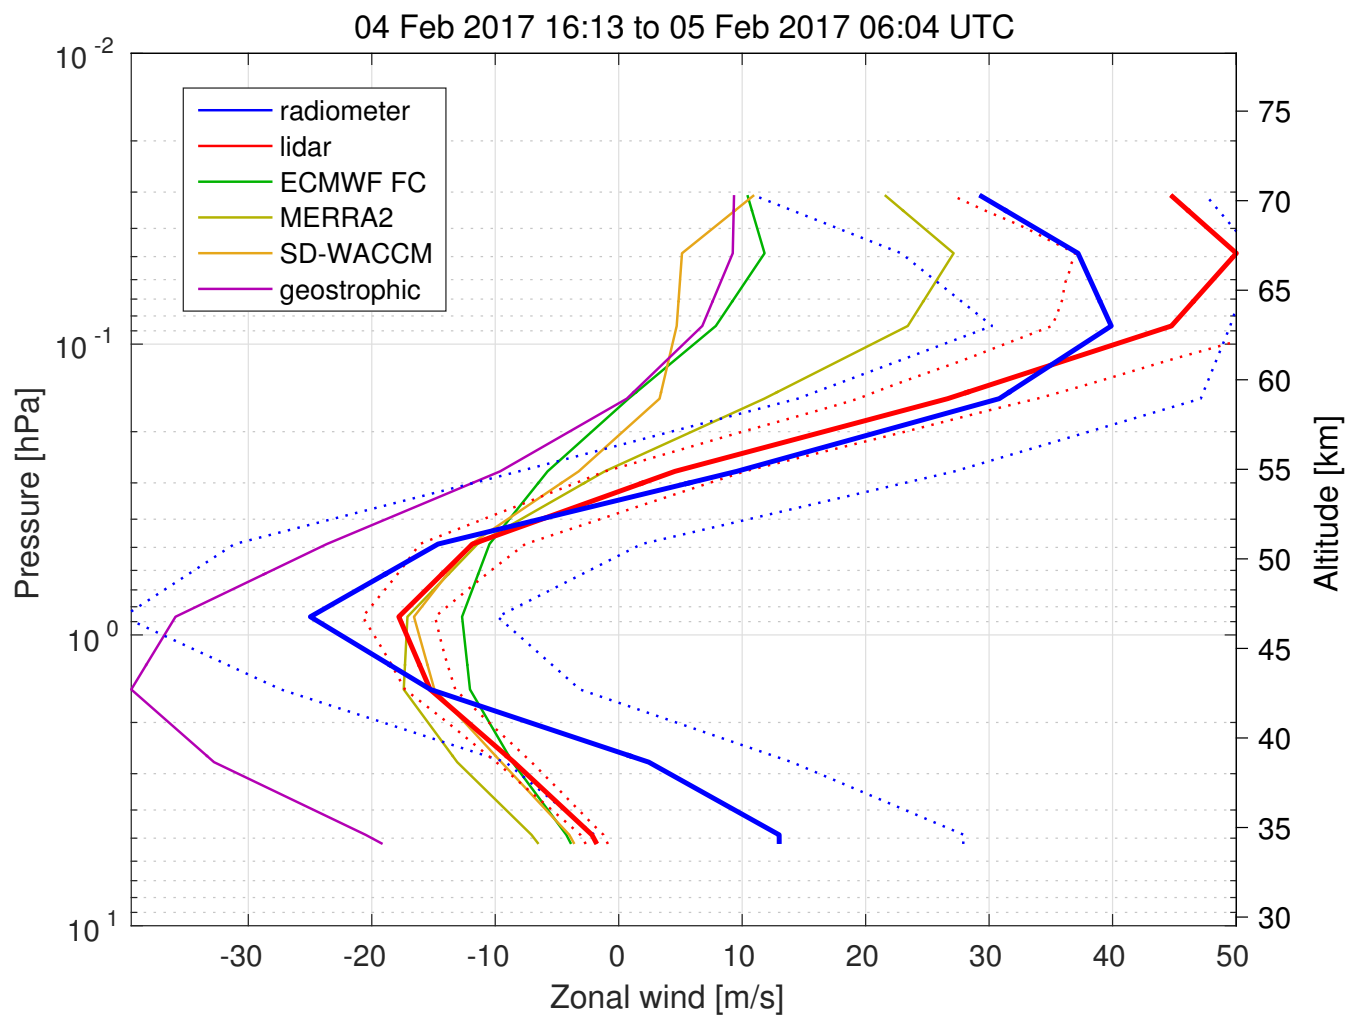

**Figure 8.** Mean profile of zonal wind for the part of the night from 4 to 5 February 2017 when both measurement systems were operated in night mode. For reasons of clarity only profiles convolved according to Eq. (2) are shown here, the same plot including the unconvolved wind profiles can be found in the Supplement's Fig. S3 (second row, fourth column). The blue and red dotted lines represent the error bands of the radiometer and lidar observations.

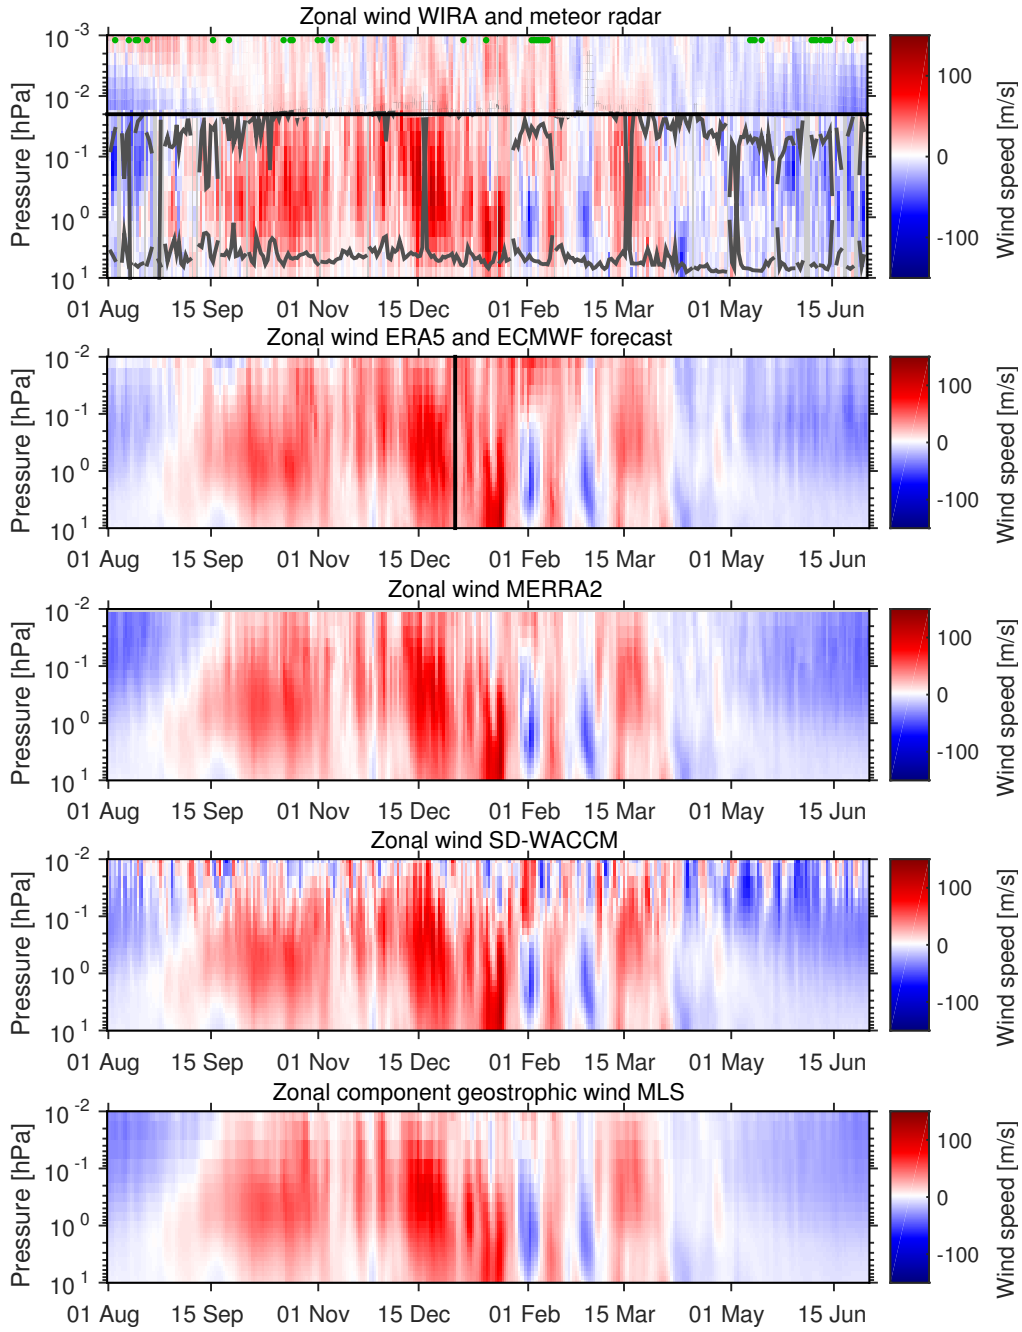

**Figure 9.** Time series of continuous or near-continuous zonal wind data at Andenes for the time period between 1 August 2016 and 30 June 2017. The green dots in the uppermost panel mark the dates where wind measurements from the RMR lidar are available. The uppermost panel shows wind radiometer data below the horizontal black line and meteor radar data above. The dark grey lines in the radiometer data denote the altitude limits within which WIRA data are trustworthy according to the conditions stated in Sect. 2.1. At the time of writing ERA5 was only available until 31 Dec 2016 (black vertical line), therefore ECMWF forecast data is plotted for 2017.

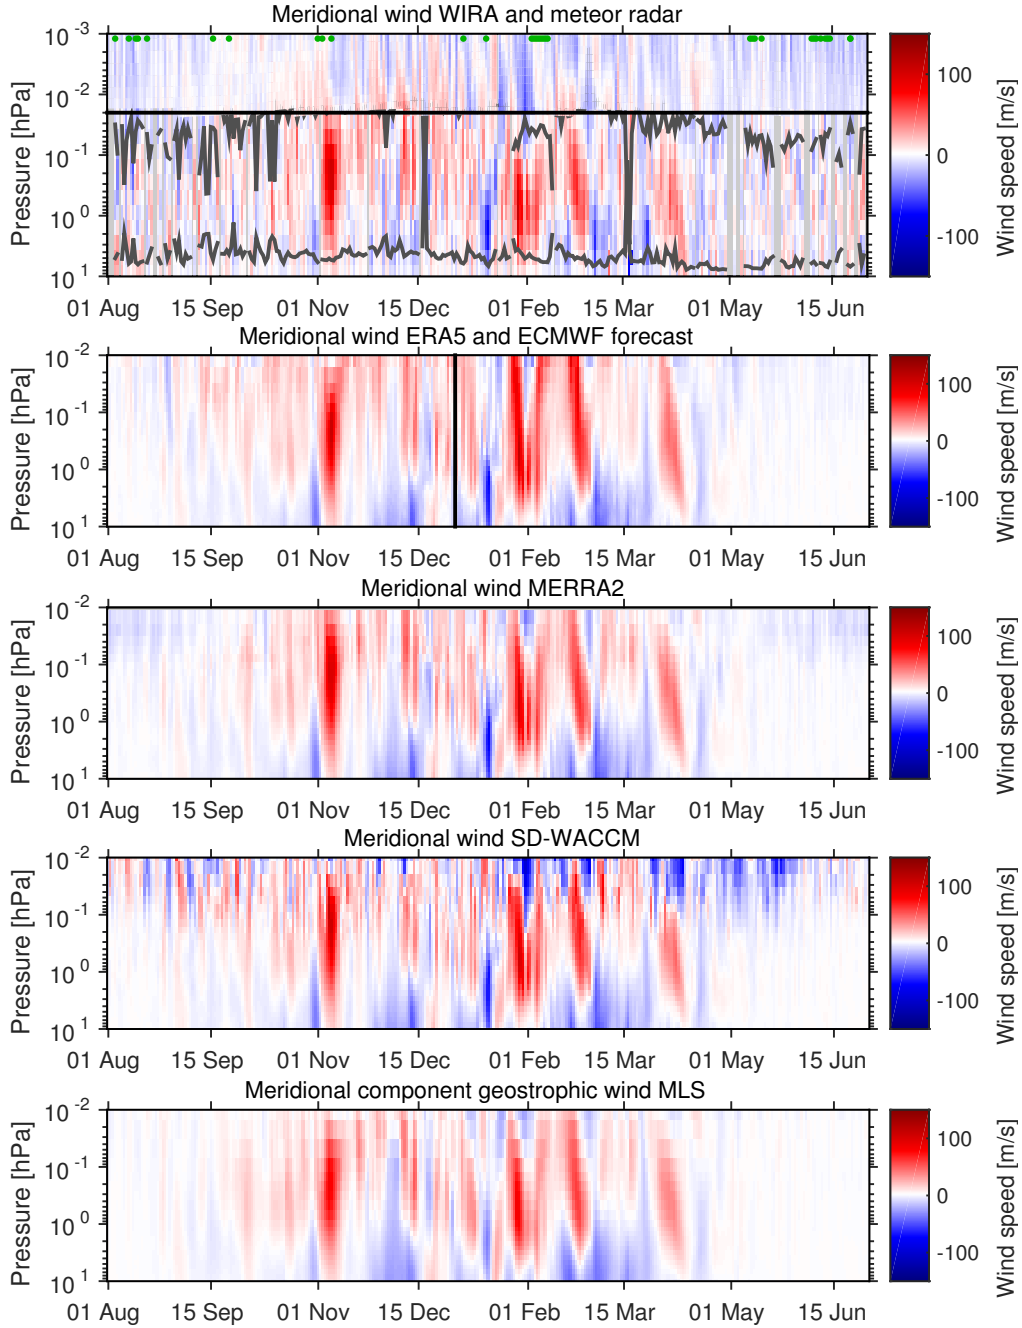

**Figure 10.** As Fig. 9 but for the meridional wind component.

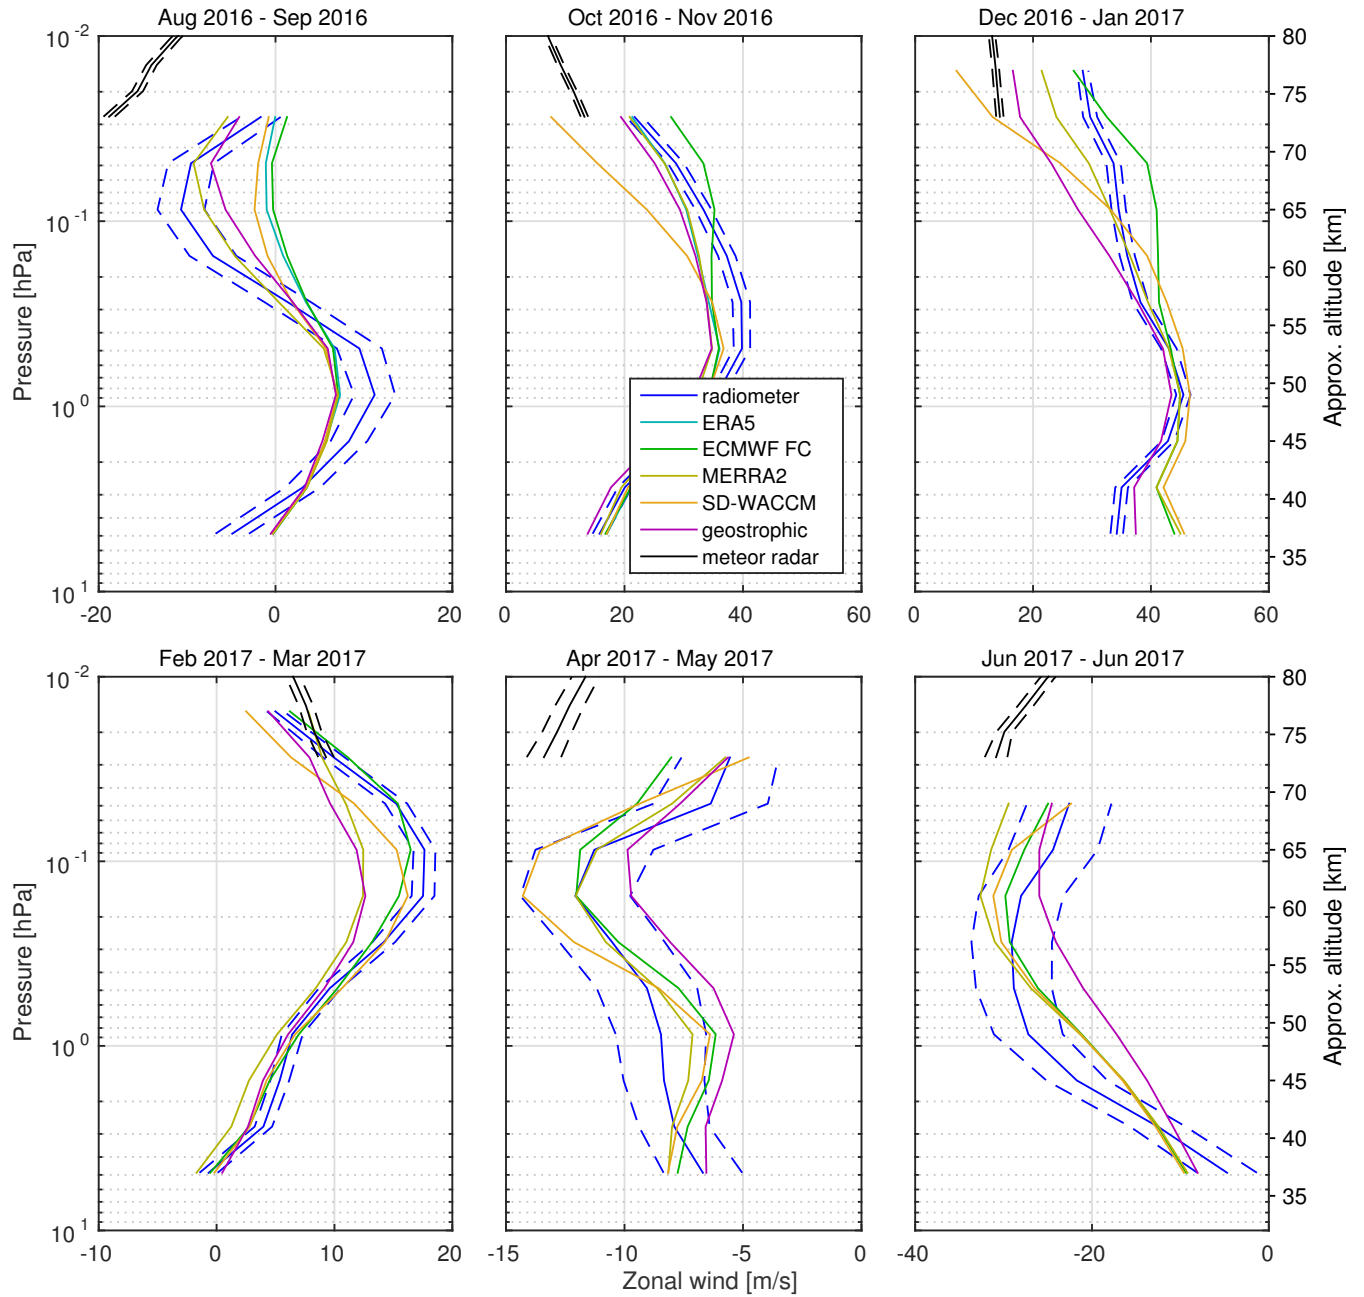

**Figure 11.** Bi-monthly average profiles of zonal wind at Andenes from re-analyses and models convolved according to Eq. (2) in comparison with observations from the wind radiometer WIRA and its random error (dashed). ERA5 data were only available for the first two panels at the time of writing. At the uppermost altitudes the unconvolved meteor radar wind profiles are shown. Due to the temporal variations of the upper altitude limit of the radiometer observations visible in Figs. 9 and 10 the sampling period of the meteor radar average wind can be rather different from the highest levels of middle-atmospheric data especially for the summer half-year, i.e. in the upper left, the lower centre and the lower right panel.

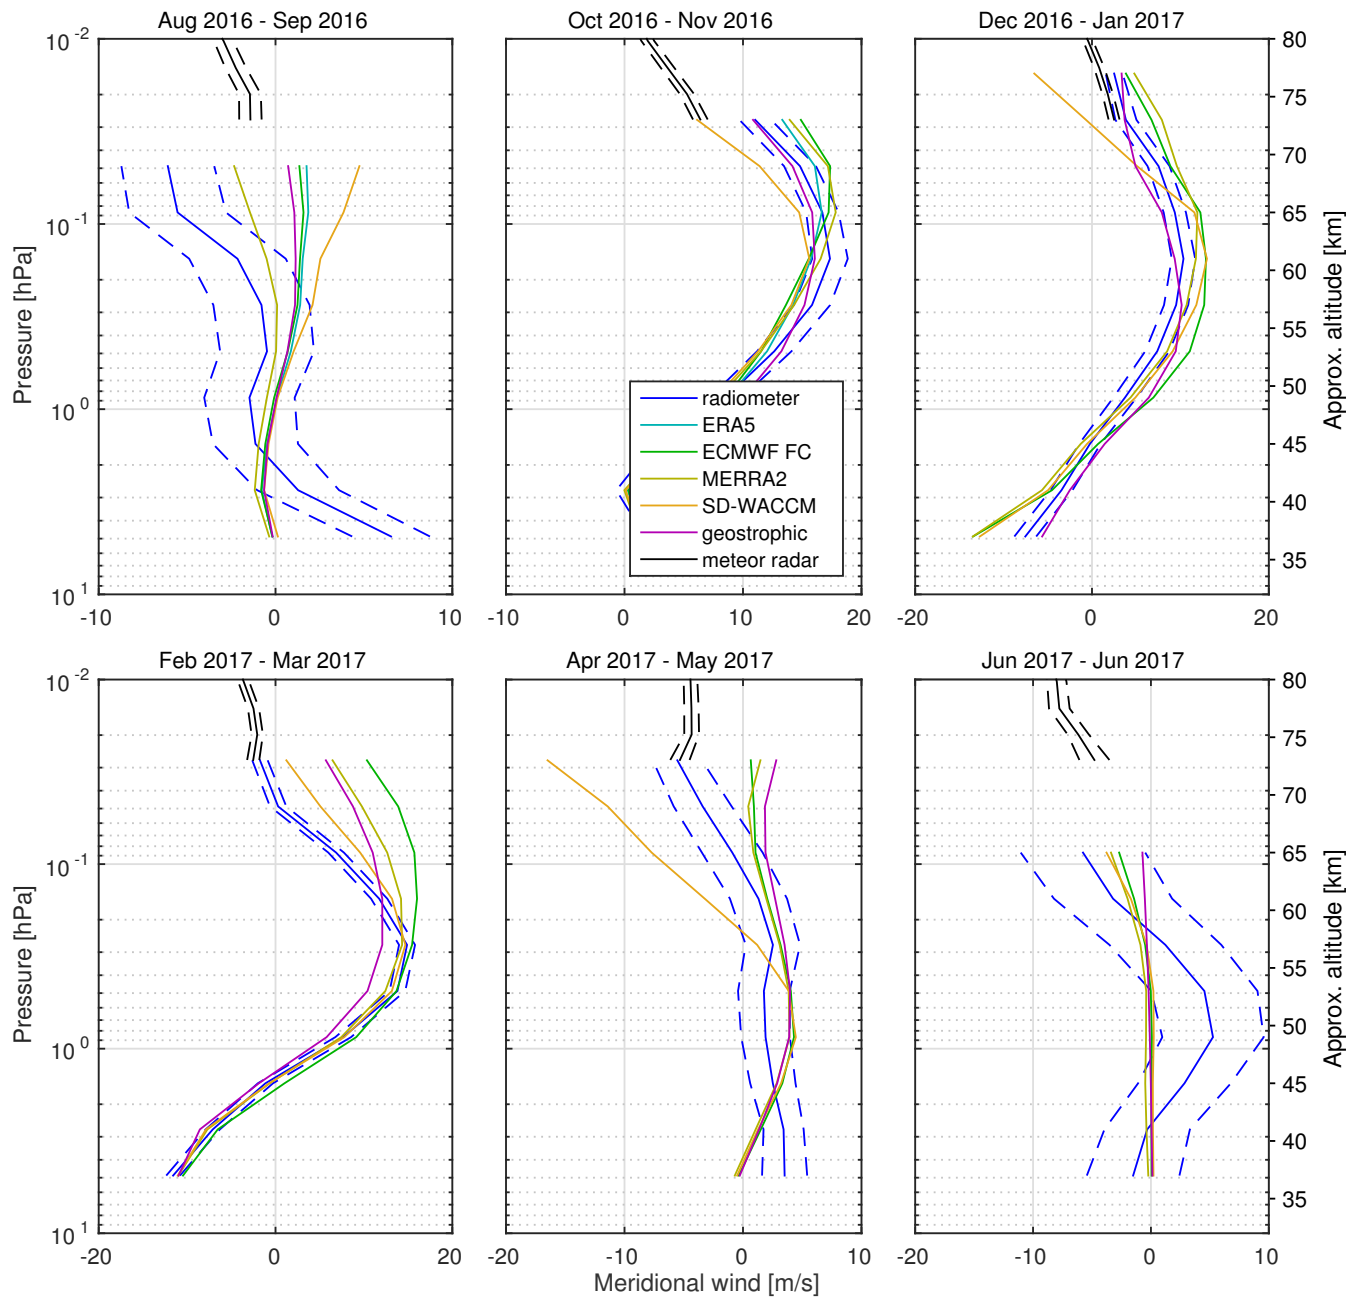

**Figure 12.** As Fig. 11 but for the meridional wind component.

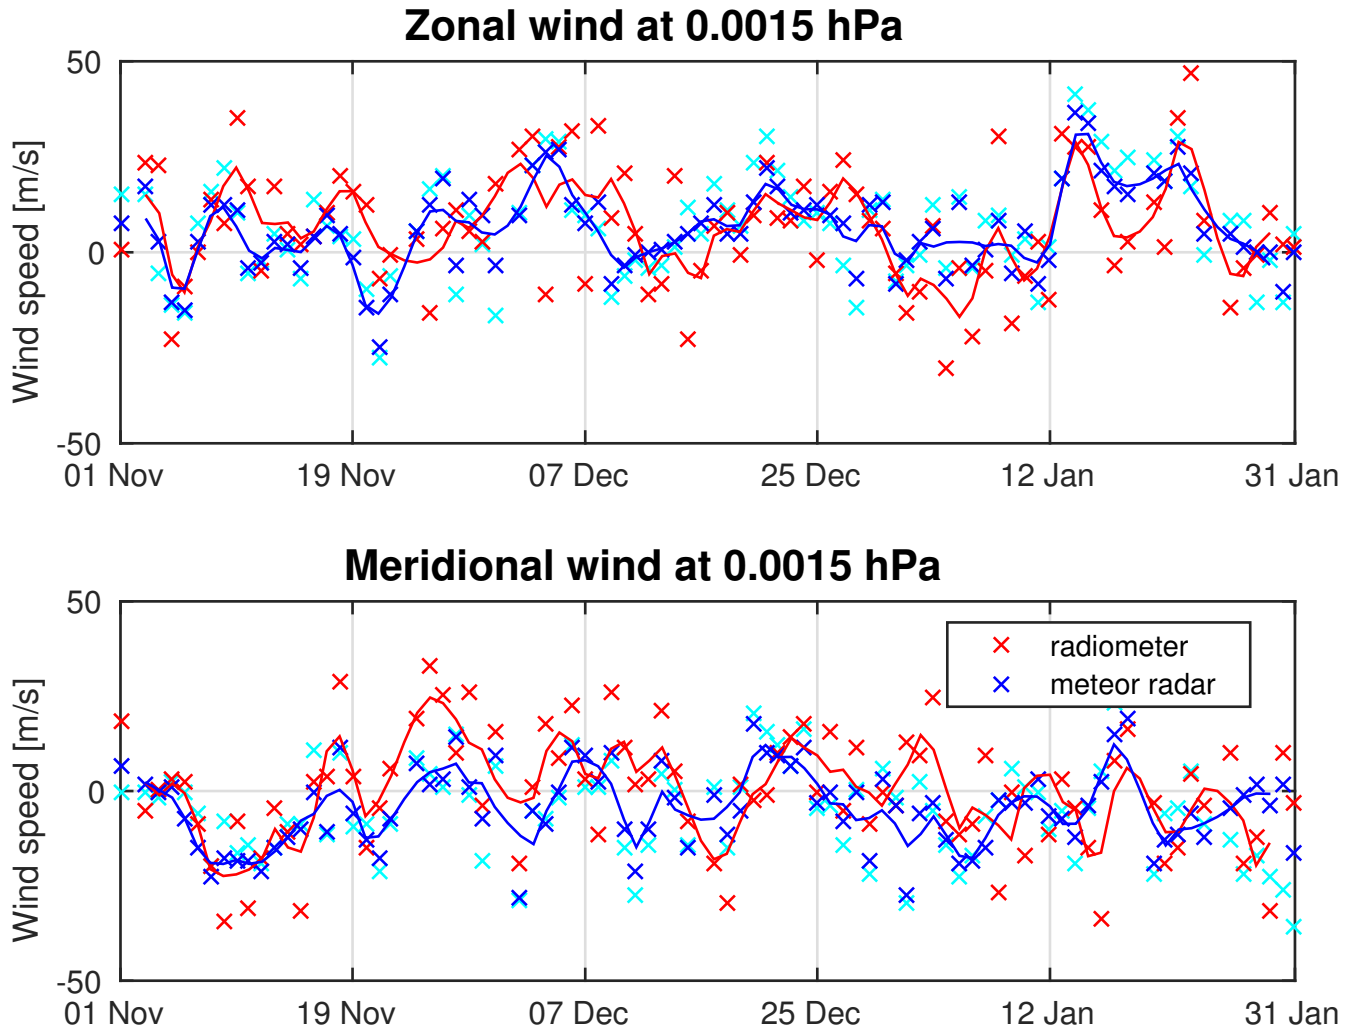

**Figure 13.** Observations of nighttime zonal and meridional wind in the mesopause region from the wind radiometer WIRA (red) and the Andenes meteor radar (dark blue: convolved with WIRA's averaging kernels according to Eq. (2); cyan: raw) for the winter months of 2016/17. The crosses denote the nightly averages whereas the coloured lines show a smoothed version of the data by a moving average filter with a span of 5 days.
